1 **Full Title:**

2 The *Klebsiella pneumoniae* citrate synthase gene, *gltA*, influences site specific fitness during infection

3  
4 **Short Title:**

5 *Klebsiella pneumoniae* citrate synthase determines fitness

6  
7 **Authors:**

8 Yuang Sun<sup>a\*</sup>, Jay Vornhagen<sup>a\*</sup>, Paul Breen<sup>a</sup>, Valerie Forsyth<sup>b</sup>, Lili Zhao<sup>c</sup>, Harry L.T. Mobley<sup>b</sup> and  
9 Michael A. Bachman<sup>a</sup>

10  
11 **Author affiliations:**

12 <sup>a</sup>Department of Pathology, University of Michigan, Ann Arbor, MI

13 <sup>b</sup>Department of Microbiology & Immunology, University of Michigan, Ann Arbor, MI

14 <sup>c</sup>Department of Biostatistics, School of Public Health, University of Michigan, Ann Arbor, MI

15  
16 \*These authors equally contributed to this work

17  
18 **Word count:**

19 10033

## Abstract

*Klebsiella pneumoniae* (Kp), one of the most common causes of healthcare-associated infections, increases patient morbidity, mortality and hospitalization costs. Kp must acquire nutrients from the host for successful infection. However, the host is able to prevent bacterial nutrient acquisition through multiple systems, including the innate immune protein lipocalin 2 (Lcn2) that prevents Kp iron acquisition by sequestering the siderophore enterobactin. To identify novel Kp factors that mediate evasion of nutritional immunity during lung infection, we undertook an InSeq study using a pool of >20,000 transposon mutants administered to *Lcn2*<sup>+/+</sup> and *Lcn2*<sup>-/-</sup> mice. Comparing mutant frequencies between mouse genotypes, this genome-wide screen identified the Kp citrate synthase GltA as potentially interacting with Lcn2, and this novel finding was independently validated. Interestingly, *in vitro* studies suggest that this interaction is not direct. Given that GltA is involved in oxidative metabolism, we screened the ability of this mutant to use a variety of carbon and nitrogen sources. The results indicated that the *gltA* mutant has a distinct amino acid auxotrophy and is unable to use a variety of carbon sources. Specifically, we show that *gltA* is necessary for growth in bronchioloalveolar lavage fluid, which is amino acid-limited, but dispensable in serum, which is amino acid rich. Deletion of *Lcn2* from the host leads to increased amino acid levels in bronchioloalveolar lavage fluid, and thus abrogates the loss of *gltA* during pneumonia in the *Lcn2*<sup>-/-</sup> background. GltA was also required for gut colonization, but dispensable in the bloodstream in a bacteremia model, demonstrating that deletion of *gltA* leads to an organ-specific fitness defect. Together, this study is the first to mechanistically describe a role for *gltA* in Kp infection and provide unique insight into how metabolic flexibility impacts bacterial fitness during infection.

## 43 **Author Summary**

44 The bacteria *Klebsiella pneumoniae* (Kp) is an important cause of infection in healthcare settings.  
45 These infections can be difficult to treat, as they frequently occur in chronically ill patients and the  
46 bacteria has the ability to acquire multiple antibiotic resistance markers. Kp is a common colonizer of  
47 the intestinal tract in hospitalized patients, and can progress to infections of the bloodstream, respiratory  
48 and urinary tract. However, the bacterial factors that allow Kp to replicate in these different body sites  
49 is unclear. In this study, we found that the Kp citrate synthase, GltA, enables bacterial replication in the  
50 lung and intestine by enhancing the ability of Kp to use diverse nutrients, in a mechanism known as  
51 metabolic flexibility. Kp lacking GltA require specific amino acids that are abundant in blood, but not  
52 other body sites. The work in this study provides novel insight into why Kp is a successful hospital  
53 pathogen that can colonize and infect multiple body sites.

54

## 55 Introduction

56 Extended spectrum beta-lactamase (ESBL)-producing *Enterobacteriaceae* and carbapenem-resistant  
57 *Enterobacteriaceae* (CRE) pose a serious public health threat due to their extensive antibiotic  
58 resistance. Many ESBL and CRE infections are healthcare-associated infections (HAIs), meaning they  
59 occur in long-term healthcare facilities and hospitals. *Klebsiella pneumoniae* (Kp) is an environmentally  
60 ubiquitous member of the *Enterobacteriaceae* family that can acquire antibiotic resistance genes [1],  
61 and thus, is a leading cause of ESBL-producing *Enterobacteriaceae* infections [2] and HAIs [3].  
62 Strikingly, mortality rates in patients infected with antibiotic resistant Kp often exceed 40% [4].  
63 Disturbingly, reports of hypervirulent clones of Kp acquiring mobile antibiotic resistance genes are  
64 becoming more frequent [5,6], posing a significant global threat to human health. As the efficacy of  
65 antibiotics diminishes and therapeutic options for patients infected with antibiotic resistant strains of Kp  
66 become increasingly limited, a better understanding of how Kp establish productive infections is  
67 necessary for the development of novel diagnostics and interventions to combat these dangerous  
68 bacteria.

69  
70 To establish a productive infection, bacterial pathogens such as Kp must acquire nutrients from the  
71 host environment. Subsequently, metabolic flexibility frequently dictates the capacity of pathogens to  
72 invade different niches [7-10]. This flexibility is defined by the ability of a bacterial pathogen to  
73 categorically or conditionally acquire and utilize different metabolites. For example, *Salmonella*  
74 *enterica* serotype Typhimurium uses tetrathionate as an electron acceptor, providing a fitness  
75 advantage in the gut, whereas this advantage is not conferred in the spleen due to the lack of  
76 tetrathionate [11]. Interestingly, Kp potentially exhibits diversity in metabolism and nutrient acquisition,  
77 as indicated by the ability to cause a wide range of severe infections, including pneumonia, bacteremia,  
78 urinary tract infection, and pyogenic liver abscess [12]. Additionally, infectious Kp frequently originates

79 from sites of colonization [13-15], including the gut and nasopharynx [16,17]; however, the impact of  
80 metabolic flexibility on Kp pathogenesis has not received significant attention.

81  
82 Metabolites necessary for niche invasion by pathogens can be acquired directly from the host, through  
83 the metabolic activity of other microorganisms within the host microbiome, or by *de novo* synthesis,  
84 and limitation of access to these nutrients by the host is a universal means of impeding niche invasion  
85 by bacterial pathogens [18-21]. For example, iron (Fe) is critical for niche invasion and subsequent  
86 pathogenesis. The host sequesters ferrous iron ( $Fe^{2+}$ ) by complexing with heme and ferric iron ( $Fe^{3+}$ )  
87 by complexing with transferrin, ferritin, or lactoferrin [18]. To overcome these complexes, bacterial  
88 pathogens such as Kp encode a variety of proteins and small molecules to harvest sequestered iron,  
89 including the family of low molecular weight chelators known as siderophores [22]. Consequently, the  
90 host further prevents iron acquisition by sequestering bacterial siderophores with innate immune  
91 molecules such as Lipocalin 2 (Lcn2). Lcn2 specifically binds the bacterial siderophore enterobactin  
92 [23]; however, highly pathogenic bacterial strains encode alternative siderophores that circumvent this  
93 activity. This strategy has been observed during Kp lung infection, wherein the presence of the  
94 alternative Kp siderophore yersiniabactin is sufficient to overcome the effects of Lcn2 [24]. Interestingly,  
95 Lcn2-bound Kp enterobactin has immunomodulatory effects [25], suggesting that the impact of Lcn2  
96 during Kp infection is not limited to sequestration of enterobactin.

97  
98 Beyond the well-characterized interaction between Lcn2 and siderophores during Kp infection, little is  
99 known about other Lcn2-interacting Kp gene products in the context of nutrient acquisition. To discover  
100 Kp genes that are conditionally essential in the presence of Lcn2, we undertook an InSeq experiment  
101 comparing lung infection in *Lcn2*<sup>+/+</sup> and *Lcn2*<sup>-/-</sup> murine backgrounds. This revealed multiple  
102 conditionally essential genes, including the citrate (Si)-synthase gene *gltA*. *In vitro* studies indicate that  
103 the interaction between GltA and Lcn2 is indirect. Further analysis revealed that deletion of *gltA*

104 dramatically reduces metabolic flexibility, leading to arginine, glutamine, glutamate, histidine, and  
105 proline auxotrophy and a severe limitation of carbon utilization. This limitation of metabolic flexibility is  
106 partially complemented during lung infection by deletion of *Lcn2* due to an increase in amino acid  
107 concentrations in bronchioloalveolar lavage fluid, and GltA is dispensable for growth in amino acid-rich  
108 environments, such as serum. Finally, using multiple murine models of infection, we show that GltA is  
109 not necessary for bacteremia, but is necessary for gut colonization independent of the presence of  
110 *Lcn2*. Together, these data reveal how Kp metabolic flexibility, conferred by the citrate (Si)-synthase  
111 GltA, impacts compartmentalized fitness during infection.

112

## 113 Results

114 To comprehensively identify novel LCN2-interacting Kp gene products during Kp lung infection, we  
115 employed a previously described transposon library in the Kp strain KPPR1 [26,27]. To this end,  
116 *Lcn2*<sup>+/+</sup> and *Lcn2*<sup>-/-</sup> mice [28] were retropharyngeally inoculated with  $1.4 \times 10^6$  CFU of a pool of ~25,000  
117 transposon mutants (Fig S1A). Twenty-four hours after inoculation, mice were euthanized, lungs were  
118 collected and homogenized, and total lung CFU were collected for DNA extraction and InSeq analysis,  
119 as previously described [26]. After filtering, each sample had greater than 50 million reads  
120 corresponding to greater than 20,000 unique transposon insertions inside of open reading frames  
121 (Dataset S1). To identify LCN2-interacting Kp genes, the number of transposon insertion reads within  
122 each gene were compared between the *Lcn2*<sup>+/+</sup> and *Lcn2*<sup>-/-</sup> lung pools (mean reads per gene were  
123 169 and 156, respectively). The log *Lcn2*<sup>+/+</sup>:*Lcn2*<sup>-/-</sup> insertion ratio of 1677 genes were significantly  
124 enriched or depleted after correction for multiple comparisons, including *entB* that is required to  
125 synthesize both enterobactin and the *Lcn2*-evading siderophore salmochelin (Dataset S1). A total of  
126 49 genes had a fitness index greater or less than 3 standard deviations from the mean log  
127 *Lcn2*<sup>+/+</sup>:*Lcn2*<sup>-/-</sup> insertion ratio (Fig S1B, Dataset S1) and 43 of these genes were considered significant  
128 after correction for multiple comparisons (Fig S1C, Dataset S1, in bold). Of the 43 interrupted genes,  
129 16 were enriched in the *Lcn2*<sup>+/+</sup> lung pool, indicating enhanced fitness when *Lcn2* is present, and 27  
130 were enriched in the *Lcn2*<sup>-/-</sup> lung pool, indicating enhanced fitness when *Lcn2* is absent. Interestingly,  
131 the most common molecular function of genes enriched in both backgrounds was metabolism [29],  
132 accounting for 10 of 43 genes (23.3%), followed by membrane transport (6 of 43, 14.0%), including the  
133 putative siderophore transport system ATP-binding protein YusV, transcription factors (4 of 43, 9.3%),  
134 two-component systems (3 of 43, 6.9%), DNA repair and recombination (2 of 43, 4.7%), protein export  
135 (1 of 43, 2.3%), and quorum sensing (1 of 43, 2.3%). The molecular function of 16 (37.2%) of these  
136 genes has not been characterized. Three gene (*gltA*, *envZ*, and VK055\_4417) enriched in the *Lcn2*<sup>-/-</sup>  
137 background were previously identified as fitness factors during Kp lung infection [26] (Dataset S1, in

138 italics). Five genes displayed a greater than 2-log enrichment in the *Lcn2*<sup>-/-</sup> lung pool, and one,  
139 VK055\_1802, had a *P* value less than 10<sup>-300</sup> (Fig S1C-D, Dataset S1). VK055\_1802 is annotated as  
140 *gltA*, which encodes the citric acid cycle enzyme citrate (Si)-synthase [30]. Together, these data indicate  
141 that metabolism is critical for the interaction between KPPR1 and the host during lung infection.

142  
143 To confirm the role of *gltA* during lung infection and its interaction with *Lcn2*, we constructed an isogenic  
144 *gltA* mutant in the KPPR1 background using the Lambda Red recombinase system [31] and  
145 complemented the gene in trans. The KPPR1 $\Delta$ *gltA* strain displayed no growth defect compared to WT  
146 KPPR1 in nutrient-rich media (Fig S1E). This mutant was mixed 1:1 with its WT parent strain, then  
147 inoculated retropharyngeally in both *Lcn2*<sup>+/+</sup> and *Lcn2*<sup>-/-</sup> mice. As observed with InSeq data, the  
148 KPPR1 $\Delta$ *gltA* displayed a significant fitness defect compared to the WT KPPR1 strain in the *Lcn2*<sup>+/+</sup>  
149 lung that was partially alleviated in the *Lcn2*<sup>-/-</sup> lung (Fig 1A). Given that citrate can act as a weak  
150 siderophore [32] and is a component of more complex siderophores [33,34], we hypothesized that  
151 deletion of *gltA* may inhibit novel stealth siderophore activity in the presence of *Lcn2*. To test this  
152 hypothesis, we grew a variety of KPPR1-derived strains in RPMI 10% resting human serum  $\pm$   
153 recombinant human *Lcn2*. The WT KPPR1 strain was not affected by the presence of *Lcn2*; however,  
154 the siderophore-null KPPR1 $\Delta$ *entB* $\Delta$ *ybtS* strain [35] was unable to grow in *Lcn2*-free conditions,  
155 indicating the importance of siderophore function for KPPR1 growth. The enterobactin-dependent  
156 KPPR1 $\Delta$ *iroA* $\Delta$ *ybtS* strain [36] was able to grow in *Lcn2*-free conditions, but unable to grow in the  
157 presence of *Lcn2*, validating the antagonistic relationship between enterobactin and *Lcn2* (Fig 1B).  
158 Surprisingly, deletion of *gltA* had no impact growth in the presence of *Lcn2* (Fig 1B), suggesting that  
159 the relationship between *gltA* and *Lcn2* during lung infection is indirect.

160  
161 Given that citrate (Si)-synthase performs an irreversible oxidation in the citric acid cycle, we next  
162 postulated that the relationship between *gltA* and *Lcn2* is due to disruption of the TCA cycle. In addition



163 to oxidative metabolism, the TCA cycle provides a number of key carbon skeletons for the biosynthesis  
164 of amino acids. To determine if loss of *GltA* affects Kp biosynthetic capabilities, we performed an  
165 unbiased screen of carbon and nitrogen sources using the BioLog system to identify conditions  
166 differentially permissive to KPPR1 $\Delta$ *gltA* growth [37]. Both the WT KPPR1 and KPPR1 $\Delta$ *gltA* were  
167 cultured under 288 different conditions in triplicate, and growth was measured after 24 hours (Fig 2A,  
168 Dataset S2). These experiments revealed 130 conditions in which WT KPPR1 significantly outgrew  
169 KPPR1 $\Delta$ *gltA*, two conditions in which KPPR1 $\Delta$ *gltA* significantly outgrew WT KPPR1, nine conditions  
170 where both strains grew equally well, and 147 conditions that did not support growth (Fig 2A, Dataset  
171 S2). These data revealed that deletion of *gltA* in KPPR1 resulted in arginine, glutamine, glutamate,  
172 histidine, and proline auxotrophy as indicated by the ability of these amino acids to support growth of  
173 the KPPR1 $\Delta$ *gltA* strain (Fig 2B, Dataset S2). Additionally, some dipeptides containing these residues  
174 were partially or fully able to support growth of the KPPR1 $\Delta$ *gltA* strain, whereas dipeptides without  
175 these residues do not (Fig 2C, Dataset S2). To confirm these findings, we replicated these experiments  
176 by growing the WT KPPR1, KPPR1 $\Delta$ *gltA*, and p*GltA* complemented strains in minimal medium (M9)  
177 containing glucose. When glucose is the sole carbon source, the KPPR1 $\Delta$ *gltA* strain is unable to grow  
178 but the addition of 10 mM glutamate fully restores growth (Fig 3A) and expression of *gltA* from a plasmid  
179 complemented the mutant. This auxotrophy was fully or partially complemented by addition of 10 mM  
180 glutamine, 2-oxoglutaric acid, and proline (Fig S2). Finally, the restoration of KPPR1 $\Delta$ *gltA* growth in M9  
181 medium containing glucose by addition of glutamate is dose-dependent (Fig 3B). These data show that  
182 deletion of *gltA* induces specific amino acid auxotrophy.

183  
184 Our data indicated that the deficiency of KPPR1 $\Delta$ *gltA* in the *Lcn2*<sup>+/+</sup> lung is related to access to specific  
185 amino acids necessary for complete growth. Bronchioalveolar lavage fluid (BALF) is an ample  
186 nutritional source for bacteria living in the upper respiratory tract, and measurable levels the amino  
187 acids arginine, glutamate, 2-oxoglutaric acid, and proline are present in both human and mouse BALF

[38-41]. To determine if the differences in KPPR1 $\Delta$ *gltA* fitness in *Lcn2*<sup>+/+</sup> and *Lcn2*<sup>-/-</sup> lungs is attributable to this source of nutrient, whole BALF was collected from uninfected mice and used as a bacterial growth medium. BALF from both mouse strains sustained growth of WT KPPR1 and KPPR1 $\Delta$ *gltA* (Fig 4A); however, KPPR1 $\Delta$ *gltA* grew significantly less well as measured by area under curve (AUC) analysis in *Lcn2*<sup>+/+</sup> BALF compared to *Lcn2*<sup>-/-</sup> BALF and WT KPPR1 cultured in *Lcn2*<sup>-/-</sup> BALF (Fig 4B). To determine if there are inherent differences in amino acid levels in the lungs of *Lcn2*<sup>+/+</sup> and *Lcn2*<sup>-/-</sup> mice that explain these differences in growth, we used gas chromatography–mass spectrometry to determine amino acid content in BALF from uninfected mice. *Lcn2*<sup>-/-</sup> BALF contains significantly higher levels of multiple amino acids and total protein content (Fig 4C, Dataset S3). Indeed, BALF from *Lcn2*<sup>+/+</sup> and *Lcn2*<sup>-/-</sup> are fully distinguishable based on their amino acid composition (Fig 4D). This increase in amino acid and protein content likely explains the difference between KPPR1 $\Delta$ *gltA* fitness in the *Lcn2*<sup>+/+</sup> and *Lcn2*<sup>-/-</sup> backgrounds by functionally complementing the loss of *gltA*.

We next hypothesized that the loss of *gltA* would not affect bacterial growth in a physiologically relevant amino acid-rich environment, such as serum. To test this hypothesis, we grew the WT KPPR1 and KPPR1 $\Delta$ *gltA* strains in minimal medium containing 20% heat-inactivated human serum. No differences in growth between the strains was observed (Fig 5A), and this result was recapitulated in both heat-inactivated and non-heat-inactivated murine sera (Fig S3). To determine if amino acid levels in human serum are sufficient to functionally complement the loss of *gltA*, we tested the growth of WT KPPR1 and KPPR1 $\Delta$ *gltA* strains in minimal medium with plasma-level concentrations of glutamine, glutamate, and proline [42,43]. Indeed, serum-level concentrations of glutamine, glutamate, and proline were able to support growth of the KPPR1 $\Delta$ *gltA* strain (Fig 5B). These data support the indication that amino acid auxotrophy induced by deletion of *gltA* is the basis of the loss of fitness observed in the amino acid poor environment of the *Lcn2*<sup>+/+</sup> lung.

213 The differential necessity of *gltA* for growth in BALF and serum led us to hypothesize that *gltA* is a  
214 fitness factor in nutritionally deplete body sites, but not in nutritionally replete body sites. To test this  
215 hypothesis, we first employed a peritoneal injection murine model of Kp infection. We injected *Lcn2*<sup>+/+</sup>  
216 and *Lcn2*<sup>-/-</sup> mice with approximately  $5 \times 10^5$  CFU of a 1:1 mix of WT KPPR1 and KPPR1 $\Delta$ *gltA*  
217 intraperitoneally. Twenty-four hours after inoculation, mice were euthanized, and blood, liver, spleen,  
218 and lungs were collected. Solid organs were homogenized, and CFU was enumerated by dilution  
219 plating. As observed in the lung infection model, KPPR1 $\Delta$ *gltA* was at a competitive disadvantage  
220 compared to WT KPPR1 in the *Lcn2*<sup>+/+</sup> lung, and this disadvantage was alleviated in the *Lcn2*<sup>-/-</sup> lung  
221 (Fig 6A). Consistent with *ex vivo* serum growth, KPPR1 $\Delta$ *gltA* was not competitively disadvantaged in  
222 the blood of either mouse background but was less fit in the spleen and liver of *Lcn2*<sup>+/+</sup> mice (Fig 6A).  
223 Next, we assessed the role of *gltA* in a different nutritionally replete body site: the large intestine. The  
224 small intestine is thought to limit microbial density through absorption of nutrients; however, the large  
225 intestine is nutritionally replete, wherein bacteria utilize complex carbohydrates to sustain high  
226 population densities [44]. Results from our metabolic screen (Fig 2A, Dataset S2) indicate that the  
227 KPPR1 $\Delta$ *gltA* strain is unable to utilize multiple sugars, thus we hypothesized that the KPPR1 $\Delta$ *gltA*  
228 strain would be less fit in large intestine. To confirm our previous findings, we compared the growth of  
229 WT KPPR1 and KPPR1 $\Delta$ *gltA* in a variety of conditions wherein only a single sugar was provided as a  
230 carbon source. Indeed, the KPPR1 $\Delta$ *gltA* strain was unable to grow with multiple single sugars as carbon  
231 source, conditions representative of the sugars available during gut colonization (Fig S4A-K). Finally,  
232 we tested the role of *gltA* in an oral inoculation model of murine Kp infection. To this end, we gavaged  
233 *Lcn2*<sup>+/+</sup> and *Lcn2*<sup>-/-</sup> mice with approximately  $5 \times 10^6$  CFU of a 1:1 mix of WT KPPR1 and KPPR1 $\Delta$ *gltA*.  
234 Twenty-four hours after inoculation, mice were euthanized, cecal contents were collected, and CFU  
235 was enumerated by dilution plating. In contrast to our previous experiments, we found that *gltA* is  
236 necessary for cecal colonization in both the *Lcn2*<sup>+/+</sup> and *Lcn2*<sup>-/-</sup> background (Fig 6B). Together, these

237 data clearly display that *gltA* influences compartmentalized fitness during infection by limiting the ability  
238 of Kp to use different nutrient sources for growth during infection.

239

## 240 Discussion

241 The ability of bacteria to utilize available nutrients upon encountering a new environment, referred to  
242 as metabolic flexibility, is critical for its survival and success. In order to achieve this end, bacteria must  
243 control highly interconnected metabolic pathways that are quickly activated based substrate availability  
244 in their local environment. Central carbon metabolism connects all pathways in the cell by providing  
245 carbon skeletons for biosynthesis of macromolecular building blocks and conversely represents  
246 convergence points for the catabolism of macromolecules. Central carbon metabolism is comprised of  
247 glycolysis, gluconeogenesis, the Entner-Doudoroff pathway, the pentose phosphate pathway, and the  
248 citric acid cycle. The research presented here identifies the citric acid cycle component, citrate (Si)-  
249 synthase (*gltA*), as a critical mediator of metabolic flexibility in Kp, and this metabolic flexibility  
250 drastically influences fitness during infection in a site-specific manner. Using multiple murine models of  
251 infection in *Lcn2*<sup>+/+</sup> and *Lcn2*<sup>-/-</sup> backgrounds, we show that *gltA* is a fitness factor during lung infection  
252 by direct and hematogenous routes, but not necessary for bacteremia. Additionally, *gltA* is necessary  
253 for gut colonization, which frequently precedes infection [12,13]. The necessity of *gltA* is determined by  
254 the nutrient composition of each respective body site, more specifically, access to amino acids that the  
255 bacteria cannot synthesize *de novo* without GltA. This is supported by the observation of differential  
256 fitness of *KPPR1ΔgltA* in the *Lcn2*<sup>+/+</sup> and *Lcn2*<sup>-/-</sup> lung, which have different endogenous levels of  
257 amino acids. Together, these data provide new insight into how Kp metabolic flexibility determines  
258 fitness during infection. The impact of this finding is highlighted by the fact that *gltA* is highly conserved  
259 among Kp strains. While the contributions of specific metabolic processes, such as iron acquisition  
260 [24,25,35,36,45-48], nitrogen utilization through urease activity [49], allantoin metabolism [50], and  
261 psicose metabolism [51] in Kp pathogenesis have been explored, this study is the first to reveal a role  
262 for central metabolism during Kp infection.

264 GltA is a type II citrate synthase, which are characteristically found in Gram-negative bacteria. The Kp  
265 GltA is closely related to the citrate synthases of other members of *Enterobacteriaceae*, such as *S.*  
266 *enterica* and *E. coli*, sharing 96% and 95% amino acid sequence identity, respectively. Interestingly,  
267 the Kp genome has multiple genes annotated as *gltA*. Apart from VK055\_1802, VK055\_2057 is  
268 annotated as *gltA* (hereafter *gltA2*). The *gltA2* gene is universally present in *Klebsiella spp.* but not in  
269 other *Enterobacteriaceae* genera. I-TASSER 3D structure prediction [52-54] indicates that GltA2 is  
270 structurally similar to GltA despite sharing only 60% and 58% amino acid sequence identity with KPPR1  
271 GltA and *E. coli* str. K-12 substr. MG1655 GltA, respectively. Despite this structural similarity, our data  
272 demonstrate that *gltA* and *gltA2* were functionally distinct, as the presence of *gltA2* was unable to  
273 complement the loss of *gltA*. While the impact of *gltA2* on metabolic flexibility has yet to be explored, it  
274 is beyond the scope of this study; however, the universal presence of *gltA2* in *Klebsiella sp.* but not in  
275 other *Enterobacteriaceae* may provide a unique opportunity as a target for species and sub-species  
276 level detections.

277  
278 Our data indicate that the loss of *gltA* abrogates the *de novo* synthesis of L-glutamate and other key  
279 carbon skeletons for biosynthesis of amino acids, which is essential to bacterial survival. Glutamate is  
280 needed for ammonia assimilation and is the fulcrum of glutamine, proline, arginine, and histidine  
281 biosynthesis [55]. In fact, glutamate and glutamine provide nitrogen for all nitrogen-containing  
282 components of the bacterial cell, and approximately 88% comes from glutamate [56]. Studies in *E. coli*  
283 have shown that glutamate is the most abundant intracellular metabolite, with an absolute intracellular  
284 concentration of 96 mM [57]. Additionally, after conversion to its D-enantiomer, glutamate serves as a  
285 component of bacterial peptidoglycan, which forms the cell wall and determines the rate of cell  
286 elongation [58]. Thus, Kp lacking *de novo* synthesis of glutamate are incapable of proliferating unless  
287 glutamate can be acquired exogenously. This is highlighted by the fact that growth of KPPR1 $\Delta$ *gltA* in  
288 M9 is rescued by the addition of glutamate in a dose-dependent manner. A complete restoration of

289 growth only occurs upon the addition of a sufficient amount of glutamate (Fig 3). Alternatively,  
290 exogenous glutamine, proline, arginine, and histidine can facilitate growth through the central nitrogen  
291 metabolic circuit or through production of glutamate through degradation [55]; however,  
292 supplementation of 2-oxoglutaric acid at a high concentration was not sufficient for a complete  
293 restoration of growth, suggesting a lack of transporting mechanism (Fig S2). Additionally, our data  
294 demonstrate that dipeptides containing glutamate, glutamine, and histidine can support growth of GltA-  
295 deficient Kp (Fig 2), suggesting that bacteria rely on scavenging dipeptides or polypeptides in the  
296 course their colonization and infection. Taken together, our findings suggest that stratifying *in vivo*  
297 environments as either nutritionally replete or deplete relative to the bacteria is apropos, and that a  
298 systems biology approach of studying bacterial metabolic flexibility is beneficial for understanding the  
299 lifestyle of pathogenic bacteria.

300  
301 By maintaining high metabolic flexibility, pathogenic bacteria can invade multiple niches, and thus,  
302 increase their chances of evolutionary success. For example, commensal *E. coli* living in the human  
303 gut favor metabolic pathways that take advantage of the sugar-rich mucus lining [59,60], whereas  
304 uropathogenic *E. coli* (UPEC) favor metabolic pathways that take advantage of the nitrogen-rich urinary  
305 tract environment [61]. As predicted, deletions in glycolysis, pentose phosphate pathway, and the  
306 Entner-Doudoroff pathway had little effect on fitness in the urinary tract environment, whereas specific  
307 citric acid cycle components are necessary [9,62]. Similarly, *Legionella pneumophila* utilizes amino  
308 acids as its primary carbon source during lung infection in immunocompromised patients [63]. Our data  
309 suggests that metabolic flexibility plays a similar role for Kp as it does for *E. coli*, wherein the ability to  
310 utilize mucin sugars is important for survival in the gut and the ability to utilize peptides and amino acids  
311 is important for Kp survival during lung infection. As abrogation of glycolysis, pentose phosphate  
312 pathway, and Entner-Doudoroff pathway enzymes do not impact UPEC survival in the urinary tract,  
313 one would expect that abrogation of these pathways has little effect on Kp fitness in the lung. Indeed,

314 transposon interruptions of specific glycolysis (*pfkB*, VK055\_3061 [*pgi*], *tpiA*, *pyk*), pentose phosphate  
315 pathway (*gnd*), and Entner-Doudoroff pathway (VK055\_1337 [*tal1*], VK055\_2566 [*tal3*], *edd*) enzymes  
316 were not functionally complemented in the *Lcn2*<sup>-/-</sup> lung (Dataset S1). Correspondingly, one would  
317 predict that specific citric acid cycle components are important for Kp fitness in the lung. Interestingly,  
318 only two citric acid cycle enzymes, *gltA*, and the fumarate reductase subunits, *frdD*, were functionally  
319 complemented in the *Lcn2*<sup>-/-</sup> lung; however, the fumarate reductase subunits (*frdA-C*) did not display  
320 a similar phenotype (Dataset S1), and furthermore, these enzymes are only used during anaerobic  
321 growth. Our previous InSeq study identified the citric acid cycle components *gltA*, *frdA*, and *frdC*, as  
322 fitness factors during lung infection [26]. Accordingly, only one glycolytic enzyme (*pfkB*), no pentose  
323 phosphate pathway enzymes, and no Entner-Doudoroff pathway enzymes were identified as fitness  
324 factors in this study [26]. Surprisingly, interruption of the citric acid cycle genes *acnA* and *frdB* and the  
325 Entner-Doudoroff pathway enzyme *tal1* resulted in enhanced fitness during lung infection in these  
326 studies; however, the underpinnings of this phenotype have yet to be explored. Taken together, these  
327 findings indicate that the oxidative citric acid cycle is beneficial for Kp lung infection, though under  
328 specific nutrient conditions only parts of the cycle are necessary for complete fitness. Furthermore, our  
329 findings highlight the importance of *gltA* to the metabolic flexibility of Kp during niche invasion in the  
330 human host and lay the groundwork for more comprehensive studies aimed at understanding the  
331 metabolic requirements for invasion of different body sites and the complex interactions between  
332 different metabolic pathways in the context of infection.

333  
334 Phenotypic metabolic flexibility has also been used to delineate closely related species of the *K.*  
335 *pneumoniae* complex, which includes *K. pneumoniae*, *K. quasipneumoniae*, and *K. variicola*, as well  
336 as Kp pathogenic lineages. *K. quasipneumoniae* is largely considered to be an opportunistic pathogen  
337 that is frequently found as a colonizer [64], whereas *K. variicola* causes more serious infections [65].  
338 The three members of this complex can be separated by their metabolic profile, wherein metabolism of



339 adonitol, psicose, tricarballic acid, and hydroxyproline phenotypically separates Kp from *K.*  
340 *quasipneumoniae* and *K. variicola* [66]. Moreover, the Kp strain used in this study, KPPR1, has been  
341 shown to be more metabolically flexible than the less pathogenic Kp strain MGH 78578 [67]. Finally,  
342 metabolism of D-arabinose [66] and allantoin [50] is associated with hyper-virulent Kp strains. As such,  
343 metabolic flexibility may be a critical dictator of the variation in clinical outcomes for different *Klebsiella*  
344 *spp.* or Kp pathogenic lineages. Our data, which support the above literature (Dataset S2, Fig S4),  
345 suggests that this is indeed the case, as reduction of metabolic flexibility through deletion of *gltA*  
346 drastically modifies fitness in different body sites (Figs 1, 6, S4). Subtle fine-tuning of metabolic capacity  
347 may confer virulence or hypervirulence to a relatively avirulent Kp strain. Indeed, *gltA* has previously  
348 been implicated to play a significant role in metabolic fine-tuning in the Lenski Experiment, wherein  
349 mutation of *gltA* permitted access to a novel nutritional niche [68]. Further exploration of the  
350 determinants of metabolic flexibility in Kp and the respective association with clinical outcomes is  
351 necessary to fully understand how specific metabolic capacity influences fitness during infection.

352  
353 While this study significantly advances our understanding of the role that metabolic flexibility plays in  
354 determining fitness during infection, it is not without its limits. Firstly, this study does not address the  
355 mechanism underlying the difference in amino acid content between the *Lcn2*<sup>+/+</sup> and *Lcn2*<sup>-/-</sup> lung.  
356 Initially this result was unexpected; however, the effects of *Lcn2* are not limited to antimicrobial activity.  
357 *Lcn2* has the ability to act as a growth and differentiation factor [69,70], as well as the ability to modulate  
358 expression of many lung epithelial cell genes [25]. While the role of *Lcn2* in these processes is not well  
359 understood, it may be the case that deletion of *Lcn2* impacts lung homeostasis, leading to altered  
360 physiology that explains the increase in amino acid levels. Although understanding the mechanism  
361 underlying this phenotype is beyond the scope of this study, the phenotype served as a useful tool to  
362 observe the effect of increased amino acid levels on Kp lung fitness. Secondly, this study exclusively  
363 uses the Kp strain KPPR1. Thirdly, we have focused solely on the citrate (Si)-synthase *GltA* in

364 describing the role of metabolic flexibility during Kp infection and have not included any additional  
365 metabolic enzymes. Additional studies including different strains of the *K. pneumoniae* complex and  
366 focusing on additional metabolic pathways are necessary to fully understand the impact of metabolic  
367 flexibility during infection.

368  
369 In summary, we have described a novel role the Kp citrate synthase gene, *gltA*, as a critical mediator  
370 of site-specific fitness during infection due to its influence on metabolic flexibility. Taken together, our  
371 results represent an advancement in our understanding of Kp metabolism during infection and enhance  
372 our knowledge of how these serious infections manifest, such that we are better able to combat these  
373 dangerous bacteria.

## 375 **Materials and Methods**

### 376 **Ethics statement**

377 This study was performed in strict accordance with the recommendations in the *Guide for the Care and*  
378 *Use of Laboratory Animals* [71]. The University of Michigan Institutional Animal Care and Use  
379 Committee approved this research (PRO00007474).

### 381 **Materials, media, and bacterial strains**

382 All chemicals were purchased from Sigma-Aldrich (St. Louis, MO) unless otherwise indicated. *K.*  
383 *pneumoniae* KPPR1 [27], which is referred to as “KPPR1” throughout this study, and isogenic mutants  
384 were cultured in Luria-Bertani (LB, Becton, Dickinson and Company, Franklin Lakes, NJ) broth at 37°C  
385 with shaking, or in M9 minimal medium (M9 salts [Thermo Fisher Scientific, Waltham, MA], 0.2 M  
386 MgSO<sub>4</sub>, 0.01 M CaCl<sub>2</sub>, 20% glucose) at 37°C with shaking, or on LB agar at 30°C (Thermo Fisher  
387 Scientific). The isogenic *gltA* mutant was constructed as previously described [26,31]. Briefly,  
388 electrocompetent KPPR1 cells containing a modified pKD46 plasmid encoding a spectinomycin  
389 resistance cassette [26,31] were electroporated with a *gltA*-specific target site fragment containing a  
390 kanamycin resistance cassette isolated from the pKD4 plasmid [31]. Transformants were selected at  
391 37°C on LB agar containing 25 µg/ml kanamycin, re-cultured, and confirmed by colony PCR using  
392 flanking primers (Table S1). The *gltA* complement plasmid was constructed using a Gibson Assembly  
393 Cloning Kit (New England Biolabs, Ipswich, MA). Briefly, the *gltA* sequence including its promoter was  
394 amplified from WT KPPR1 by PCR (Table S1) and ligated into the pACYC184 backbone [72] to create  
395 the pGltA plasmid. The ligation mixture was transformed into NEB 10-beta Competent *E. coli* (New  
396 England Biolabs) by heat shock. Transformants were selected at 37°C on LB agar containing 30 µg/ml  
397 chloramphenicol, re-cultured, and confirmed by colony PCR using (Table S1). Single transformants  
398 were then grown in batch culture for plasmid extraction using the Plasmid Midi Kit (Qiagen,  
399 Germantown, MD). KPPR1Δ*gltA* competent cells were prepared as previously described [26],

400 electroporated with the pGltA plasmid, and selected at 37°C on LB agar containing 30 µg/ml  
401 chloramphenicol. Following selection, transformants were re-cultured, and confirmed by colony PCR  
402 (Table S1) and by growth in M9 minimal broth.

### 404 **Transposon library construction and InSeq**

405 Construction of the transposon library used in this study has been extensively described elsewhere  
406 [26]. Briefly, the pSAM\_Ec plasmid [73] was modified by replacement of the ampicillin resistance  
407 cassette with a chloramphenicol acetyltransferase gene from the pKD3 plasmid [31] to create the  
408 pSAM\_Cam plasmid [26]. The transposon library was constructed by mating KPPR1 with *E. coli* S17  
409 λpir carrying the pSAM\_Cam plasmid, followed by induction of the transposase by growth in the  
410 presence of 250 µM IPTG (Invitrogen, Carlsbad, CA) and selection on LB agar containing 25 µg/ml  
411 kanamycin and 30 µg/ml rifampicin. Insertion sequencing was performed as previously described [26]  
412 and deposited in the Sequence Read Archive (accession number to follow). KPPR1 has 5191 predicted  
413 genes [27], and previous calculations indicate that an inoculum of  $1.1 \times 10^5$  CFU should result in a 99%  
414 probability of each transposon mutant being present at least once during lung infection [26]. Following  
415 infection, total recovered transposon mutants were collected, gDNA was isolated using the DNeasy  
416 Blood and Tissue Kit (Qiagen, Germantown, MD), and genomic sequences adjacent to insertion sites  
417 were amplified by PCR. Following amplification, Illumina sequencing adapters were ligated to amplified  
418 junction DNA fragments, and then fragments were sequencing on an Illumina HiSeq2500 Instrument  
419 (Illumina, San Diego, CA). Sequencing reads were filtered, mapped and normalized as described [26].

### 421 **Murine models of infection**

422 Six- to 12-week-old C57BL/6J mice (*Lcn2*<sup>+/+</sup>, Jackson Laboratory, Jackson, ME) or isogenic *Lcn2*<sup>-/-</sup>  
423 mice [28] were used for all murine models of infection. Kp was cultured overnight in LB, then bacteria  
424 were pelleted, resuspended, and diluted in sterile phosphate-buffered saline (PBS) to the appropriate

dose. For lung infection studies, a dose of  $1 \times 10^6$  CFU was determined to provide sufficient representation of all mutants in the transposon library [26]. At the time of inoculation, mice were anesthetized with isoflurane, approximately  $1 \times 10^6$  CFU was inoculated in the pharynx, and the mouse was monitored until ambulatory. For validation of InSeq findings, WT KPPR1 and KPPR1 $\Delta$ *gltA* were cultured overnight in LB, then bacteria were pelleted, resuspended, mixed 1:1, diluted in sterile PBS to the appropriate dose, and  $1 \times 10^6$  CFU was inoculated in the pharynx. After 24 hours, mice were euthanized by CO<sub>2</sub> asphyxiation and lungs were collected, weighed, and homogenized in sterile PBS, and homogenates were dilution plated on selective media to determine bacterial load. For bacteremia studies, WT KPPR1 and KPPR1 $\Delta$ *gltA* were cultured overnight in LB, then bacteria were pelleted, resuspended, mixed 1:1, diluted in sterile PBS to the appropriate dose, and mice were inoculated intraperitoneally with approximately  $5 \times 10^5$  CFU. After 24 hours, mice were euthanized by CO<sub>2</sub> asphyxiation and blood, spleen, liver, and lungs were collected. Solid organs weighed and homogenized in sterile PBS, and whole blood and solid organ homogenates were plated on selective media. For oral inoculation studies, WT KPPR1 and KPPR1 $\Delta$ *gltA* were cultured overnight in LB, then bacteria were pelleted, resuspended, mixed 1:1, diluted in sterile PBS to the appropriate dose, and mice were inoculated orally with approximately  $5 \times 10^6$  CFU. After 48 hours, mice were euthanized by CO<sub>2</sub> asphyxiation and cecal contents were collected, weighed, and homogenized in sterile PBS, and homogenates were dilution plated on selective media to determine bacterial load. In all models, mice were monitored daily for signs of distress (hunched posture, ruffled fur, decreased mobility, and dehydration) and euthanized at predetermined timepoints, or if signs of significant distress were displayed. No blinding was performed between experimental groups.

## **Preparation of recombinant human lipocalin 2 protein and Lcn2 growth assay**

Human lipocalin 2 was recombinantly expressed, purified, and validated as previously described [46,74,75]. WT KPPR1 and various isogenic mutants were grown overnight in LB, then inoculated in

450 RPMI with 10% (v/v) heat-inactivated resting human serum with or without 1.6  $\mu$ M purified recombinant  
451 human Lcn2 at a concentration of  $1 \times 10^3$  CFU/mL. Cultures were incubated overnight at 37°C with 5%  
452 CO<sub>2</sub>, and bacterial density was enumerated by dilution plating.

### 454 **BioLog Phenotype MicroArray analysis**

455 BioLog Phenotype MicroArrays (Biolog, Hayward, CA) analysis was performed in accordance with  
456 manufacturer's instruction with some modifications. WT KPPR1 and KPPR1 $\Delta$ *gltA* were cultured  
457 overnight in LB, then bacteria were pelleted, washed once in sterile PBS, then re-suspended in sterile  
458 PBS. Each strain was diluted in IF-0 medium to a final OD<sub>600</sub> of 0.035, then diluted again to final  
459 inoculation concentrations as per manufacturer's instruction. The final inoculum (100  $\mu$ L) was plated  
460 onto plates PM1, PM2, and PM3. Sodium pyruvate (Thermo Fisher Scientific) was used as a carbon  
461 source for PM3 at a final concentration of 2 mM in accordance with previous metabolic phenotype  
462 analysis [66]. After inoculation, plates were sealed to avoid cross contamination of volatile compounds  
463 produced during Kp growth [66,76] and statically incubated overnight at 37°C. Following overnight  
464 incubation, growth was measured at OD<sub>595</sub>.

### 466 **Growth curves**

467 The WT KPPR1 and KPPR1 $\Delta$ *gltA* strains were cultured overnight in LB broth, then diluted to a  
468 uniform OD<sub>600</sub> of 0.01 in the culture medium of interest the following day. Culture media included LB,  
469 M9 minimal medium with or without amino acid, carbon source, or serum supplementation, RPMI with  
470 10% (v/v) serum (see "Preparation of recombinant human lipocalin 2 protein and Lcn2 growth assay"  
471 for details), and BALF (see below for details). Amino acids were supplemented at 10 mM unless  
472 otherwise indicated, and carbon sources were supplemented at 5 mg/mL. Cultures were incubated at  
473 37°C and OD<sub>600</sub> readings were taken every 15 min using an Eon microplate reader with Gen5  
474 software (Version 2.0, BioTek, Winooski, VT) for up to 24 hours.

475

## 476 **Serum growth assay**

477 The WT KPPR1 and KPPR1 $\Delta$ *gltA* strains were cultured overnight in LB broth with antibiotic  
478 supplementation, if necessary. Bacteria were then washed with M9 minimal media by centrifugation,  
479 resuspended, and diluted to an OD<sub>600</sub> of 0.01 in M9 minimal media supplemented with 20% (v/v) murine  
480 or discarded human serum. For some experiments, sera were heat-inactivated at 56 °C for 30 minutes.  
481 Cultures were grown at 37°C and OD<sub>600</sub> readings were taken every 15 min using an Eon microplate  
482 reader with Gen5 software (Version 2.0, BioTek, Winooski, VT) for up to 24 hours.

483

## 484 **BALF growth assay**

485 Six- to 12-week-old C57BL/6J mice (*Lcn2*<sup>+/+</sup>, Jackson Laboratory, Jackson, ME) or isogenic *Lcn2*<sup>-/-</sup>  
486 mice [28] were used for BALF collection. Briefly, mice were euthanized by CO<sub>2</sub> asphyxiation and  
487 tracheas were exposed. A small incision was made in the trachea, and polyethylene tubing (external  
488 diameter 0.965 mm, internal diameter 0.58 mm, BD, Franklin Lakes, NJ) attached to a 23-gauge luer-  
489 stub adaptor and syringe containing 2 mL sterile PBS. Following tubing insertion, 4-0 silk suture  
490 (Ethicon, Somerville, NJ) was used secure the trachea and then the lungs were flushed with PBS. BALF  
491 was kept on ice until processing, wherein BALF was centrifuged at 21,130 x *g* for 30 min at 4°C to pellet  
492 contaminating bacteria, then supernatant was stored at -80°C. Rifampin was added to BALF to a final  
493 concentration of 30 µg/ml immediately prior to use. The WT KPPR1 and KPPR1 $\Delta$ *gltA* strains were  
494 cultured overnight in LB broth with antibiotic supplementation, if necessary. Bacteria were washed with  
495 PBS by centrifugation, resuspended, diluted to an OD<sub>600</sub> of 0.1 in sterile PBS, then mixed with BALF  
496 from independent mice at a ratio of 1:9. Cultures were incubated at 37°C and OD<sub>600</sub> readings were  
497 taken every 15 min using an Eon microplate reader with Gen5 software (Version 2.0, BioTek, Winooski,  
498 VT) for up to 24 hours.

499

500

## 501 **Metabolomic analysis of BALF**

502 For metabolomic analysis 100  $\mu\text{L}$  of BALF was used. 20  $\mu\text{L}$  was set aside to create a pooled sample  
503 from all study samples, and the remaining 80  $\mu\text{L}$  of each BALF sample was prepared for GC-MS  
504 analysis according to manufacturer instructions using the Phenomenex EZFaast Free Amino Acids  
505 Analysis GC-MS kit (Phenomenex, Torrance, CA, USA). Briefly, BALF samples were combined with an  
506 internal standard (norvaline) and subjected to cation exchange solid phase extraction to purify amino  
507 acids from proteins, salts and other matrix components. The amino acids were then derivatized using  
508 a proprietary reagent and catalyst, the solvent is evaporated under a gentle nitrogen stream at room  
509 temperature, and finally the sample is resuspended for GC analysis. Quality control samples were  
510 prepared by pooling equal volumes of each sample and were injected at the beginning and the end of  
511 each analysis and after every 10 sample injections to provide a measurement of the system's stability  
512 and performance as well as reproducibility of the sample preparation method. The pooled sample was  
513 treated identically to the study samples and was analyzed along with the samples for quality control  
514 purposes. Calibration standards were prepared containing all 20 proteinogenic amino acids at  
515 concentrations of 10, 25, 50 and 100  $\mu\text{M}$  and were analyzed in replicate along with samples to enable  
516 absolute quantitation of amino acids.

517

518 GC-MS analysis was performed on an Agilent 69890N GC -5975 MS detector with the following  
519 parameters: a 1  $\mu\text{L}$  sample was injected with a 1:15 split ratio on an ZB-AAA 10 m column  
520 (Phenomenex, Torrance, CA, USA) with a He gas flow rate of 1.1 mL/min. The GC oven initial  
521 temperature was 110°C and was increased at 30°C per minute to 320°C. The inlet temperature was  
522 250°C and the MS-source and quad temperatures were 230° and 150°C respectively. GC-MS data  
523 were processed using MassHunter Quantitative Analysis software version B.07.00. Amino acids were  
524 quantitated as  $\mu\text{M/L}$  BALF using linear calibration curves generated from the standards listed above.



525 To generate these curves, all peak areas in samples and calibration standards were first normalized to  
526 the peak area of the internal standard, norvaline. Based on replicate analysis of biological samples,  
527 the quantitative variability for all reported amino acids using this method is <15% RSD.

## 529 **Statistical analysis**

530 All *in vitro* experimental replicates represent biological replicates. For *in vitro* studies, except  
531 metabolomic analysis, two-tailed Student's *t*-tests or ANOVA followed by Sidak's multiple comparisons  
532 post-hoc test was used to determine significant differences between groups. For metabolomic analysis,  
533 R version 3.5 and the "gplots," "pca3d," and "rgl" packages were used for data visualization and the  
534 "limma" package was used for false discovery rate correction. All animal studies except the InSeq  
535 study were replicated at least twice. Competitive indices were log transformed and a one-sample *t*-test  
536 was used to determine significant differences from a hypothetical value of 0 or two-tailed Student's *t*-  
537 test was used to determine significant differences between groups. A *P* value of less than 0.05 was  
538 considered statistically significant for the above experiments, and analysis was performed using Prism  
539 6 (GraphPad Software, La Jolla, CA). For InSeq analysis, a p-value was first calculated for each  
540 insertion using an exact Poisson test for comparing the two groups, and then the insertion-level p-  
541 values were combined using Fisher's method [77] to obtain the statistical significance for each gene.  
542 Finally, the p-values were adjusted to control the false discovery rate (Dabney A and Storey JD. qvalue:  
543 Q-value estimation for false discovery rate control. R package version 1.43.0.). A *P* value of less than  
544  $1.3 \times 10^{-5}$  was considered statistically significant.

## 547 **Acknowledgements and Funding**

548 We would like to acknowledge Thekkelnaycke Rajendiran, Ph.D. and The Michigan Regional  
549 Comprehensive Metabolomics Resource Core at the University of Michigan School of Medicine for their  
550 assistance with the metabolomics aspects of this study. We would also like to thank Christ Alteri, Ph.D.,  
551 Robert P. Dickson, M.D. and Nicole Falkowski for their insightful discussion, assistance, and critical  
552 edits. Finally, we would like to thank the University of Michigan Animal Care and Use staff for their  
553 assistance. This work was supported by funding from National Institution of Health  
554 (<https://www.nih.gov/>) grants AI125307 to M.A.B. and AI059722 and DK094777 to H.L.T.M. J.V. was  
555 supported by the Molecular Mechanisms of Microbial Pathogenesis training grant (NIH T32 AI007528).  
556 The work performed by the Metabolomics Core Services was supported by grant U24 DK097153 of  
557 NIH Common Funds Project (<https://commonfund.nih.gov/>) to the University of Michigan. The funders  
558 had no role in study design, data collection and analysis, decision to publish, or preparation of the  
559 manuscript. Y.S., J.V., P.B., V.F., H.L.T.M. and M.A.B. designed and performed the experiments. Y.S,  
560 J.V., and M.A.B. wrote and edited the manuscript. L.Z. designed and performed statistical analysis for  
561 InSeq experiments.

## References

1. Navon-Venezia S, Kondratyeva K, Carattoli A (2017) *Klebsiella pneumoniae*: a major worldwide source and shuttle for antibiotic resistance. *FEMS Microbiol Rev* 41: 252-275.
2. Castanheira M, Farrell SE, Krause KM, Jones RN, Sader HS (2014) Contemporary diversity of beta-lactamases among Enterobacteriaceae in the nine U.S. census regions and ceftazidime-avibactam activity tested against isolates producing the most prevalent beta-lactamase groups. *Antimicrob Agents Chemother* 58: 833-838.
3. Magill SS, Edwards JR, Bamberg W, Beldavs ZG, Dumyati G, et al. (2014) Multistate Point-Prevalence Survey of Health Care–Associated Infections. *New England Journal of Medicine* 370: 1198-1208.
4. Munoz-Price LS, Poirel L, Bonomo RA, Schwaber MJ, Daikos GL, et al. (2013) Clinical epidemiology of the global expansion of *Klebsiella pneumoniae* carbapenemases. *Lancet Infect Dis* 13: 785-796.
5. Lee CR, Lee JH, Park KS, Jeon JH, Kim YB, et al. (2017) Antimicrobial Resistance of Hypervirulent *Klebsiella pneumoniae*: Epidemiology, Hypervirulence-Associated Determinants, and Resistance Mechanisms. *Front Cell Infect Microbiol* 7: 483.
6. Bialek-Davenet S, Criscuolo A, Ailloud F, Passet V, Jones L, et al. (2014) Genomic definition of hypervirulent and multidrug-resistant *Klebsiella pneumoniae* clonal groups. *Emerg Infect Dis* 20: 1812-1820.
7. Rohmer L, Hocquet D, Miller SI (2011) Are pathogenic bacteria just looking for food? *Metabolism and microbial pathogenesis. Trends Microbiol* 19: 341-348.
8. Radlinski LC, Brunton J, Steele S, Taft-Benz S, Kawula TH (2018) Defining the Metabolic Pathways and Host-Derived Carbon Substrates Required for *Francisella tularensis* Intracellular Growth. *MBio* 9.

- 587 9. Alteri CJ, Himpf SD, Mobley HL (2015) Preferential use of central metabolism in vivo reveals a  
588 nutritional basis for polymicrobial infection. *PLoS Pathog* 11: e1004601.
- 589 10. Alteri CJ, Mobley HL (2012) *Escherichia coli* physiology and metabolism dictates adaptation to  
590 diverse host microenvironments. *Curr Opin Microbiol* 15: 3-9.
- 591 11. Winter SE, Thiennimitr P, Winter MG, Butler BP, Huseby DL, et al. (2010) Gut inflammation provides  
592 a respiratory electron acceptor for *Salmonella*. *Nature* 467: 426-429.
- 593 12. Martin RM, Bachman MA (2018) Colonization, Infection, and the Accessory Genome of *Klebsiella*  
594 *pneumoniae*. *Front Cell Infect Microbiol* 8: 4.
- 595 13. Martin RM, Cao J, Brisse S, Passet V, Wu W, et al. (2016) Molecular Epidemiology of Colonizing  
596 and Infecting Isolates of *Klebsiella pneumoniae*. *mSphere* 1.
- 597 14. Gorrie CL, Mirceta M, Wick RR, Edwards DJ, Thomson NR, et al. (2017) Gastrointestinal Carriage  
598 Is a Major Reservoir of *Klebsiella pneumoniae* Infection in Intensive Care Patients. *Clin Infect*  
599 *Dis* 65: 208-215.
- 600 15. Johanson WG, Jr., Pierce AK, Sanford JP, Thomas GD (1972) Nosocomial respiratory infections  
601 with gram-negative bacilli. The significance of colonization of the respiratory tract. *Ann Intern*  
602 *Med* 77: 701-706.
- 603 16. Rosenthal S, Tager IB (1975) Prevalence of gram-negative rods in the normal pharyngeal flora.  
604 *Ann Intern Med* 83: 355-357.
- 605 17. Thom BT (1970) *Klebsiella* in faeces. *Lancet* 2: 1033.
- 606 18. Weinberg ED (1975) Nutritional immunity. Host's attempt to withhold iron from microbial invaders.  
607 *Jama* 231: 39-41.
- 608 19. Baumler AJ, Sperandio V (2016) Interactions between the microbiota and pathogenic bacteria in  
609 the gut. *Nature* 535: 85-93.
- 610 20. Hood MI, Skaar EP (2012) Nutritional immunity: transition metals at the pathogen-host interface.  
611 *Nat Rev Microbiol* 10: 525-537.

- 612 21. Kehl-Fie TE, Skaar EP (2010) Nutritional immunity beyond iron: a role for manganese and zinc.  
613 Curr Opin Chem Biol 14: 218-224.
- 614 22. Holden VI, Bachman MA (2015) Diverging roles of bacterial siderophores during infection.  
615 Metallomics 7: 986-995.
- 616 23. Goetz DH, Holmes MA, Borregaard N, Bluhm ME, Raymond KN, et al. (2002) The neutrophil  
617 lipocalin NGAL is a bacteriostatic agent that interferes with siderophore-mediated iron  
618 acquisition. Mol Cell 10: 1033-1043.
- 619 24. Bachman MA, Oyler JE, Burns SH, Caza M, Lepine F, et al. (2011) *Klebsiella pneumoniae*  
620 yersiniabactin promotes respiratory tract infection through evasion of lipocalin 2. Infect Immun  
621 79: 3309-3316.
- 622 25. Holden VI, Lenio S, Kuick R, Ramakrishnan SK, Shah YM, et al. (2014) Bacterial siderophores that  
623 evade or overwhelm lipocalin 2 induce hypoxia inducible factor 1alpha and proinflammatory  
624 cytokine secretion in cultured respiratory epithelial cells. Infect Immun 82: 3826-3836.
- 625 26. Bachman MA, Breen P, Deornellas V, Mu Q, Zhao L, et al. (2015) Genome-Wide Identification of  
626 *Klebsiella pneumoniae* Fitness Genes during Lung Infection. MBio 6: e00775.
- 627 27. Broberg CA, Wu W, Cavalcoli JD, Miller VL, Bachman MA (2014) Complete Genome Sequence of  
628 *Klebsiella pneumoniae* Strain ATCC 43816 KPPR1, a Rifampin-Resistant Mutant Commonly  
629 Used in Animal, Genetic, and Molecular Biology Studies. Genome Announc 2.
- 630 28. Flo TH, Smith KD, Sato S, Rodriguez DJ, Holmes MA, et al. (2004) Lipocalin 2 mediates an innate  
631 immune response to bacterial infection by sequestering iron. Nature 432: 917-921.
- 632 29. Kanehisa M, Sato Y, Kawashima M, Furumichi M, Tanabe M (2016) KEGG as a reference resource  
633 for gene and protein annotation. Nucleic Acids Res 44: D457-462.
- 634 30. Bloxham DP, Herbert CJ, Ner SS, Drabble WT (1983) Citrate synthase activity in *Escherichia coli*  
635 harbouring hybrid plasmids containing the *gltA* gene. J Gen Microbiol 129: 1889-1897.

- 636 31. Datsenko KA, Wanner BL (2000) One-step inactivation of chromosomal genes in *Escherichia coli*  
637 K-12 using PCR products. *Proc Natl Acad Sci U S A* 97: 6640-6645.
- 638 32. Gueriot ML, Meidl EJ, Plessner O (1990) Citrate as a siderophore in *Bradyrhizobium japonicum*.  
639 *J Bacteriol* 172: 3298-3303.
- 640 33. Konetschny-Rapp S, Jung G, Meiwes J, Zahner H (1990) Staphyloferrin A: a structurally new  
641 siderophore from staphylococci. *Eur J Biochem* 191: 65-74.
- 642 34. Gross R, Engelbrecht F, Braun V (1985) Identification of the genes and their polypeptide products  
643 responsible for aerobactin synthesis by pColV plasmids. *Mol Gen Genet* 201: 204-212.
- 644 35. Holden VI, Wright MS, Houle S, Collingwood A, Dozois CM, et al. (2018) Iron Acquisition and  
645 Siderophore Release by Carbapenem-Resistant Sequence Type 258 *Klebsiella pneumoniae*.  
646 *mSphere* 3.
- 647 36. Bachman MA, Lenio S, Schmidt L, Oyler JE, Weiser JN (2012) Interaction of lipocalin 2, transferrin,  
648 and siderophores determines the replicative niche of *Klebsiella pneumoniae* during pneumonia.  
649 *MBio* 3.
- 650 37. Bochner BR (1989) Sleuthing out bacterial identities. *Nature* 339: 157-158.
- 651 38. Hong JH, Lee WC, Hsu YM, Liang HJ, Wan CH, et al. (2014) Characterization of the biochemical  
652 effects of naphthalene on the mouse respiratory system using NMR-based metabolomics. *J Appl*  
653 *Toxicol* 34: 1379-1388.
- 654 39. Grahl N, Puttikamonkul S, Macdonald JM, Gamcsik MP, Ngo LY, et al. (2011) In vivo hypoxia and  
655 a fungal alcohol dehydrogenase influence the pathogenesis of invasive pulmonary aspergillosis.  
656 *PLoS Pathog* 7: e1002145.
- 657 40. Hu JZ, Rommereim DN, Minard KR, Woodstock A, Harrer BJ, et al. (2008) Metabolomics in lung  
658 inflammation: a high-resolution (1)h NMR study of mice exposed to silica dust. *Toxicol Mech*  
659 *Methods* 18: 385-398.

- 660 41. Evans CR, Karnovsky A, Kovach MA, Standiford TJ, Burant CF, et al. (2014) Untargeted LC-MS  
661 metabolomics of bronchoalveolar lavage fluid differentiates acute respiratory distress syndrome  
662 from health. *J Proteome Res* 13: 640-649.
- 663 42. Hisamatsu T, Okamoto S, Hashimoto M, Muramatsu T, Andou A, et al. (2012) Novel, objective,  
664 multivariate biomarkers composed of plasma amino acid profiles for the diagnosis and  
665 assessment of inflammatory bowel disease. *PLoS One* 7: e31131.
- 666 43. Smolenska Z, Smolenski RT, Zdrojewski Z (2016) Plasma concentrations of amino acid and  
667 nicotinamide metabolites in rheumatoid arthritis--potential biomarkers of disease activity and  
668 drug treatment. *Biomarkers* 21: 218-224.
- 669 44. Byndloss MX, Pernitzsch SR, Baumler AJ (2018) Healthy hosts rule within: ecological forces  
670 shaping the gut microbiota. *Mucosal Immunol* 11: 1299-1305.
- 671 45. Holden VI, Breen P, Houle S, Dozois CM, Bachman MA (2016) *Klebsiella pneumoniae*  
672 Siderophores Induce Inflammation, Bacterial Dissemination, and HIF-1alpha Stabilization during  
673 Pneumonia. *mBio* 7.
- 674 46. Bachman MA, Miller VL, Weiser JN (2009) Mucosal lipocalin 2 has pro-inflammatory and iron-  
675 sequestering effects in response to bacterial enterobactin. *PLoS Pathog* 5: e1000622.
- 676 47. Lawlor MS, O'Connor C, Miller VL (2007) Yersiniabactin is a virulence factor for *Klebsiella*  
677 *pneumoniae* during pulmonary infection. *Infect Immun* 75: 1463-1472.
- 678 48. Hsieh PF, Lin TL, Lee CZ, Tsai SF, Wang JT (2008) Serum-induced iron-acquisition systems and  
679 TonB contribute to virulence in *Klebsiella pneumoniae* causing primary pyogenic liver abscess.  
680 *J Infect Dis* 197: 1717-1727.
- 681 49. Maroncle N, Rich C, Forestier C (2006) The role of *Klebsiella pneumoniae* urease in intestinal  
682 colonization and resistance to gastrointestinal stress. *Res Microbiol* 157: 184-193.

- 683 50. Chou HC, Lee CZ, Ma LC, Fang CT, Chang SC, et al. (2004) Isolation of a chromosomal region of  
684 *Klebsiella pneumoniae* associated with allantoin metabolism and liver infection. *Infect Immun*  
685 72: 3783-3792.
- 686 51. Martin RM, Cao J, Wu W, Zhao L, Manthei DM, et al. (2018) Identification of Pathogenicity-  
687 Associated Loci in *Klebsiella pneumoniae* from Hospitalized Patients. *mSystems* 3.
- 688 52. Yang J, Yan R, Roy A, Xu D, Poisson J, et al. (2015) The I-TASSER Suite: protein structure and  
689 function prediction. *Nat Methods* 12: 7-8.
- 690 53. Roy A, Kucukural A, Zhang Y (2010) I-TASSER: a unified platform for automated protein structure  
691 and function prediction. *Nat Protoc* 5: 725-738.
- 692 54. Zhang Y (2008) I-TASSER server for protein 3D structure prediction. *BMC Bioinformatics* 9: 40.
- 693 55. Neidhardt FC, Curtiss R (1996) *Escherichia coli* and *Salmonella* : cellular and molecular biology.  
694 Washington, D.C.: ASM Press.
- 695 56. Wohlheuter R, Schutt H, Holzer H (1973) *The Enzymes of Glutamine Metabolism*. Academic Press,  
696 New York. pp. 45-64.
- 697 57. Bennett BD, Kimball EH, Gao M, Osterhout R, Van Dien SJ, et al. (2009) Absolute metabolite  
698 concentrations and implied enzyme active site occupancy in *Escherichia coli*. *Nat Chem Biol* 5:  
699 593-599.
- 700 58. Rojas E, Theriot JA, Huang KC (2014) Response of *Escherichia coli* growth rate to osmotic shock.  
701 *Proc Natl Acad Sci U S A* 111: 7807-7812.
- 702 59. Fabich AJ, Jones SA, Chowdhury FZ, Cernosek A, Anderson A, et al. (2008) Comparison of carbon  
703 nutrition for pathogenic and commensal *Escherichia coli* strains in the mouse intestine. *Infect*  
704 *Immun* 76: 1143-1152.
- 705 60. Chang DE, Smalley DJ, Tucker DL, Leatham MP, Norris WE, et al. (2004) Carbon nutrition of  
706 *Escherichia coli* in the mouse intestine. *Proc Natl Acad Sci U S A* 101: 7427-7432.



- 707 61. Roesch PL, Redford P, Batchelet S, Moritz RL, Pellett S, et al. (2003) Uropathogenic *Escherichia*  
708 *coli* use d-serine deaminase to modulate infection of the murine urinary tract. *Mol Microbiol* 49:  
709 55-67.
- 710 62. Alteri CJ, Smith SN, Mobley HL (2009) Fitness of *Escherichia coli* during urinary tract infection  
711 requires gluconeogenesis and the TCA cycle. *PLoS Pathog* 5: e1000448.
- 712 63. Manske C, Hilbi H (2014) Metabolism of the vacuolar pathogen *Legionella* and implications for  
713 virulence. *Front Cell Infect Microbiol* 4: 125.
- 714 64. Holt KE, Wertheim H, Zadoks RN, Baker S, Whitehouse CA, et al. (2015) Genomic analysis of  
715 diversity, population structure, virulence, and antimicrobial resistance in *Klebsiella pneumoniae*,  
716 an urgent threat to public health. *Proc Natl Acad Sci U S A* 112: E3574-3581.
- 717 65. Maatallah M, Vading M, Kabir MH, Bakhrouf A, Kalin M, et al. (2014) *Klebsiella variicola* is a frequent  
718 cause of bloodstream infection in the stockholm area, and associated with higher mortality  
719 compared to *K. pneumoniae*. *PLoS One* 9: e113539.
- 720 66. Blin C, Passet V, Touchon M, Rocha EPC, Brisse S (2017) Metabolic diversity of the emerging  
721 pathogenic lineages of *Klebsiella pneumoniae*. *Environ Microbiol* 19: 1881-1898.
- 722 67. Henry CS, Rotman E, Lathem WW, Tyo KE, Hauser AR, et al. (2017) Generation and Validation of  
723 the iKp1289 Metabolic Model for *Klebsiella pneumoniae* KPPR1. *J Infect Dis* 215: S37-s43.
- 724 68. Quandt EM, Gollihar J, Blount ZD, Ellington AD, Georgiou G, et al. (2015) Fine-tuning citrate  
725 synthase flux potentiates and refines metabolic innovation in the Lenski evolution experiment.  
726 *ELife* 4.
- 727 69. Schmidt-Ott KM, Mori K, Li JY, Kalandadze A, Cohen DJ, et al. (2007) Dual action of neutrophil  
728 gelatinase-associated lipocalin. *J Am Soc Nephrol* 18: 407-413.
- 729 70. Wang Y, Jia M, Yan X, Cao L, Barnes PJ, et al. (2017) Increased neutrophil gelatinase-associated  
730 lipocalin (NGAL) promotes airway remodelling in chronic obstructive pulmonary disease. *Clin*  
731 *Sci (Lond)* 131: 1147-1159.

- 732 71. (2011) Guide for the Care and Use of Laboratory Animals: Eighth Edition; Council NR, editor.  
733 Washington, DC: The National Academies Press. 246 p.
- 734 72. Chang AC, Cohen SN (1978) Construction and characterization of amplifiable multicopy DNA  
735 cloning vehicles derived from the P15A cryptic miniplasmid. J Bacteriol 134: 1141-1156.
- 736 73. Wiles TJ, Norton JP, Russell CW, Dalley BK, Fischer KF, et al. (2013) Combining quantitative  
737 genetic footprinting and trait enrichment analysis to identify fitness determinants of a bacterial  
738 pathogen. PLoS Genet 9: e1003716.
- 739 74. Yang J, Goetz D, Li JY, Wang W, Mori K, et al. (2002) An iron delivery pathway mediated by a  
740 lipocalin. Mol Cell 10: 1045-1056.
- 741 75. Bundgaard JR, Sengelov H, Borregaard N, Kjeldsen L (1994) Molecular cloning and expression of  
742 a cDNA encoding NGAL: a lipocalin expressed in human neutrophils. Biochem Biophys Res  
743 Commun 202: 1468-1475.
- 744 76. Bos LD, Sterk PJ, Schultz MJ (2013) Volatile metabolites of pathogens: a systematic review. PLoS  
745 Pathog 9: e1003311.
- 746 77. Fisher RA (1992) Statistical methods for research workers. Breakthroughs in statistics: Springer.  
747 pp. 66-70.
- 748
- 749

## 750 **Figure Legends**

### 751 **Fig 1. The Kp citrate synthase, *gltA*, interacts indirectly with Lcn2 during lung infection.**

752 (A) A Lambda Red recombinase mutant of *gltA* (VK055\_1802) was constructed and used to validate  
753 InSeq findings. C57BL/6J mice or isogenic *Lcn2*<sup>-/-</sup> mice were retropharyngeally inoculated with  
754 approximately  $1 \times 10^6$  CFU of a 1:1 mix of WT KPPR1 and KPPR1 $\Delta$ *gltA*. Lung bacterial burden was  
755 measured after 24 hours, and log competitive index of the mutant strain compared to the WT strain was  
756 calculated for each mouse strain (n = 10, mean displayed, \**P* < 0.05, \*\*\**P* < 0.0005, \*\*\*\**P* < 0.00005,  
757 one-sample *t* test or Student's *t* test). (B) WT KPPR1 and various isogenic mutants were grown in RPMI  
758 + 10% (v/v) heat-inactivated resting human serum  $\pm$  purified recombinant human Lcn2 overnight, then  
759 total CFU was enumerated by dilution plating on selective media (n = 3-4, mean displayed  $\pm$  SEM, \*\*\*\**P*  
760 < 0.00005, Student's *t* test).

### 762 **Fig 2. Deletion of *gltA* leads to diminished metabolic flexibility and distinct amino acid auxotrophy.**

763  
764 (A) Heatmap summarizing BioLog Phenotype Microarray analysis of WT KPPR1 and KPPR1 $\Delta$ *gltA*  
765 growth in 288 carbon and nitrogen limited growth conditions indicates multiple conditions that  
766 sustained growth of WT KPPR1 but not KPPR1 $\Delta$ *gltA*. (B) A subset of growth conditions summarizing  
767 glycolysis and non-essential amino acid biosynthesis that indicates a distinct amino acid auxotrophy is  
768 induced by deletion of *gltA*. Arrows from citric acid cycle intermediates indicate amino acids that utilize  
769 these intermediates for biosynthesis. (C) A subset of growth conditions summarizing dipeptide  
770 utilization that further indicates induction of a distinct amino acid auxotrophy by deletion of *gltA* (n = 3,  
771 mean displayed, \**P* < 0.05, Student's *t* test).

### 773 **Fig 3. Auxotrophy due to deletion of *gltA* is functionally complimented by glutamate.**

774 (A) WT KPPR1, KPPR1 $\Delta$ *gltA*, and KPPR1 $\Delta$ *gltA*pGltA were grown in M9 minimal media + 20% glucose  
775 with 10 mM glutamate (n = 3, mean displayed  $\pm$  SEM) or (B) increasing concentrations of glutamate (n  
776 = 3, mean displayed  $\pm$  SEM). “+AA” label indicates addition of amino acid to growth media at  
777 concentrations indicated in graph title.

778  
779 **Fig 4. Bronchoalveolar lavage fluid from *Lcn2*<sup>-/-</sup> mice can sustain growth of KPPR1 $\Delta$ *gltA* due to**  
780 **increased amino acid levels.**

781 (A) Murine bronchoalveolar lavage fluid (BALF) was obtained from uninfected C57BL/6J mice or  
782 isogenic *Lcn2*<sup>-/-</sup> mice, and WT KPPR1 and KPPR1 $\Delta$ *gltA* were grown 100% BALF (n = 3, mean  
783 displayed  $\pm$  SEM). (B) Area under curve (AUC) analysis was used to compare growth of WT KPPR1  
784 and KPPR1 $\Delta$ *gltA* in *Lcn2*<sup>+/+</sup> and *Lcn2*<sup>-/-</sup> BALF. Data are normalized to growth of WT KPPR1 in *Lcn2*<sup>+/+</sup>  
785 BALF (n = 3, mean displayed  $\pm$  SEM, \*\**P* < 0.005, ANOVA followed by Sidak’s multiple comparisons  
786 post-hoc test). (C) Total amino acid content from uninfected C57BL/6J mice or isogenic *Lcn2*<sup>-/-</sup> mice  
787 subjected to metabolomic analysis (n = 6-7, mean displayed, \**P* < 0.05, Student’s *t* test). (D) Heatmap  
788 of amino acid concentrations in BALF obtained from uninfected C57BL/6J mice or isogenic *Lcn2*<sup>-/-</sup> mice  
789 subjected to metabolomic analysis (significantly different [FDR *P* < 0.05] amino acid concentrations  
790 displayed, n  $\geq$  6 mice/group). Blue histogram in inset indicates composite amino acid concentration  
791 values in heatmap matrix.

792  
793 **Fig 5. *gltA* is dispensable for growth in human serum.**

794 (A) WT KPPR1 and KPPR1 $\Delta$ *gltA* were grown in M9 minimal media + 20% resting human serum (n =  
795 3, mean displayed  $\pm$  SEM). (B) WT KPPR1, KPPR1 $\Delta$ *gltA*, and KPPR1 $\Delta$ *gltA*pGltA were grown M9  
796 minimal media + 20% glucose with physiological levels of amino acids present in human serum (n = 3,  
797 mean displayed  $\pm$  SEM). “+AA” label indicates addition of amino acids to growth media at  
798 concentrations indicated in graph title.

799

800 **Fig 6. *gltA* influences compartmentalized fitness during bacteremia.**

801 (A) C57BL/6J mice or isogenic *Lcn2*<sup>-/-</sup> mice were intraperitoneally inoculated with approximately  $5 \times 10^5$   
802 CFU of a 1:1 mix of WT KPPR1 and KPPR1 $\Delta$ *gltA*. Bacterial burden in the blood, spleen, liver, and lung  
803 was measured after 24 hours, and log competitive index of the mutant strain compared to the WT strain  
804 was calculated for each mouse strain (n = 9-11/group, mean displayed, \**P* < 0.05, \*\*\*\**P* < 0.00005,  
805 one-sample *t* test or Student's *t* test). (B) C57BL/6J mice or isogenic *Lcn2*<sup>-/-</sup> mice were orally inoculated  
806 with approximately  $5 \times 10^6$  CFU of a 1:1 mix of WT KPPR1 and KPPR1 $\Delta$ *gltA*. After 48 hours, mice were  
807 euthanized and cecal bacterial load was measured by dilution plating (n = 12-17, mean displayed, \**P*  
808 < 0.05, Student's *t* test).

809

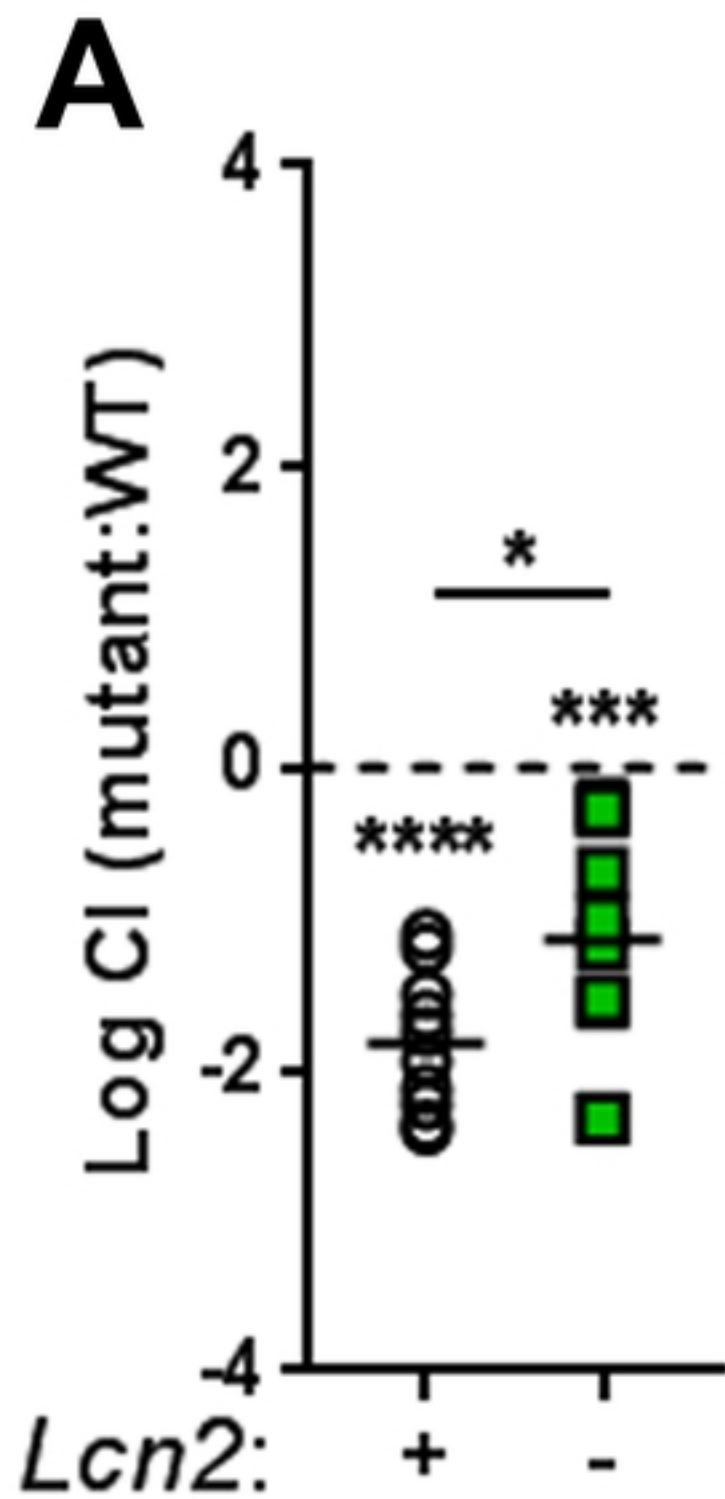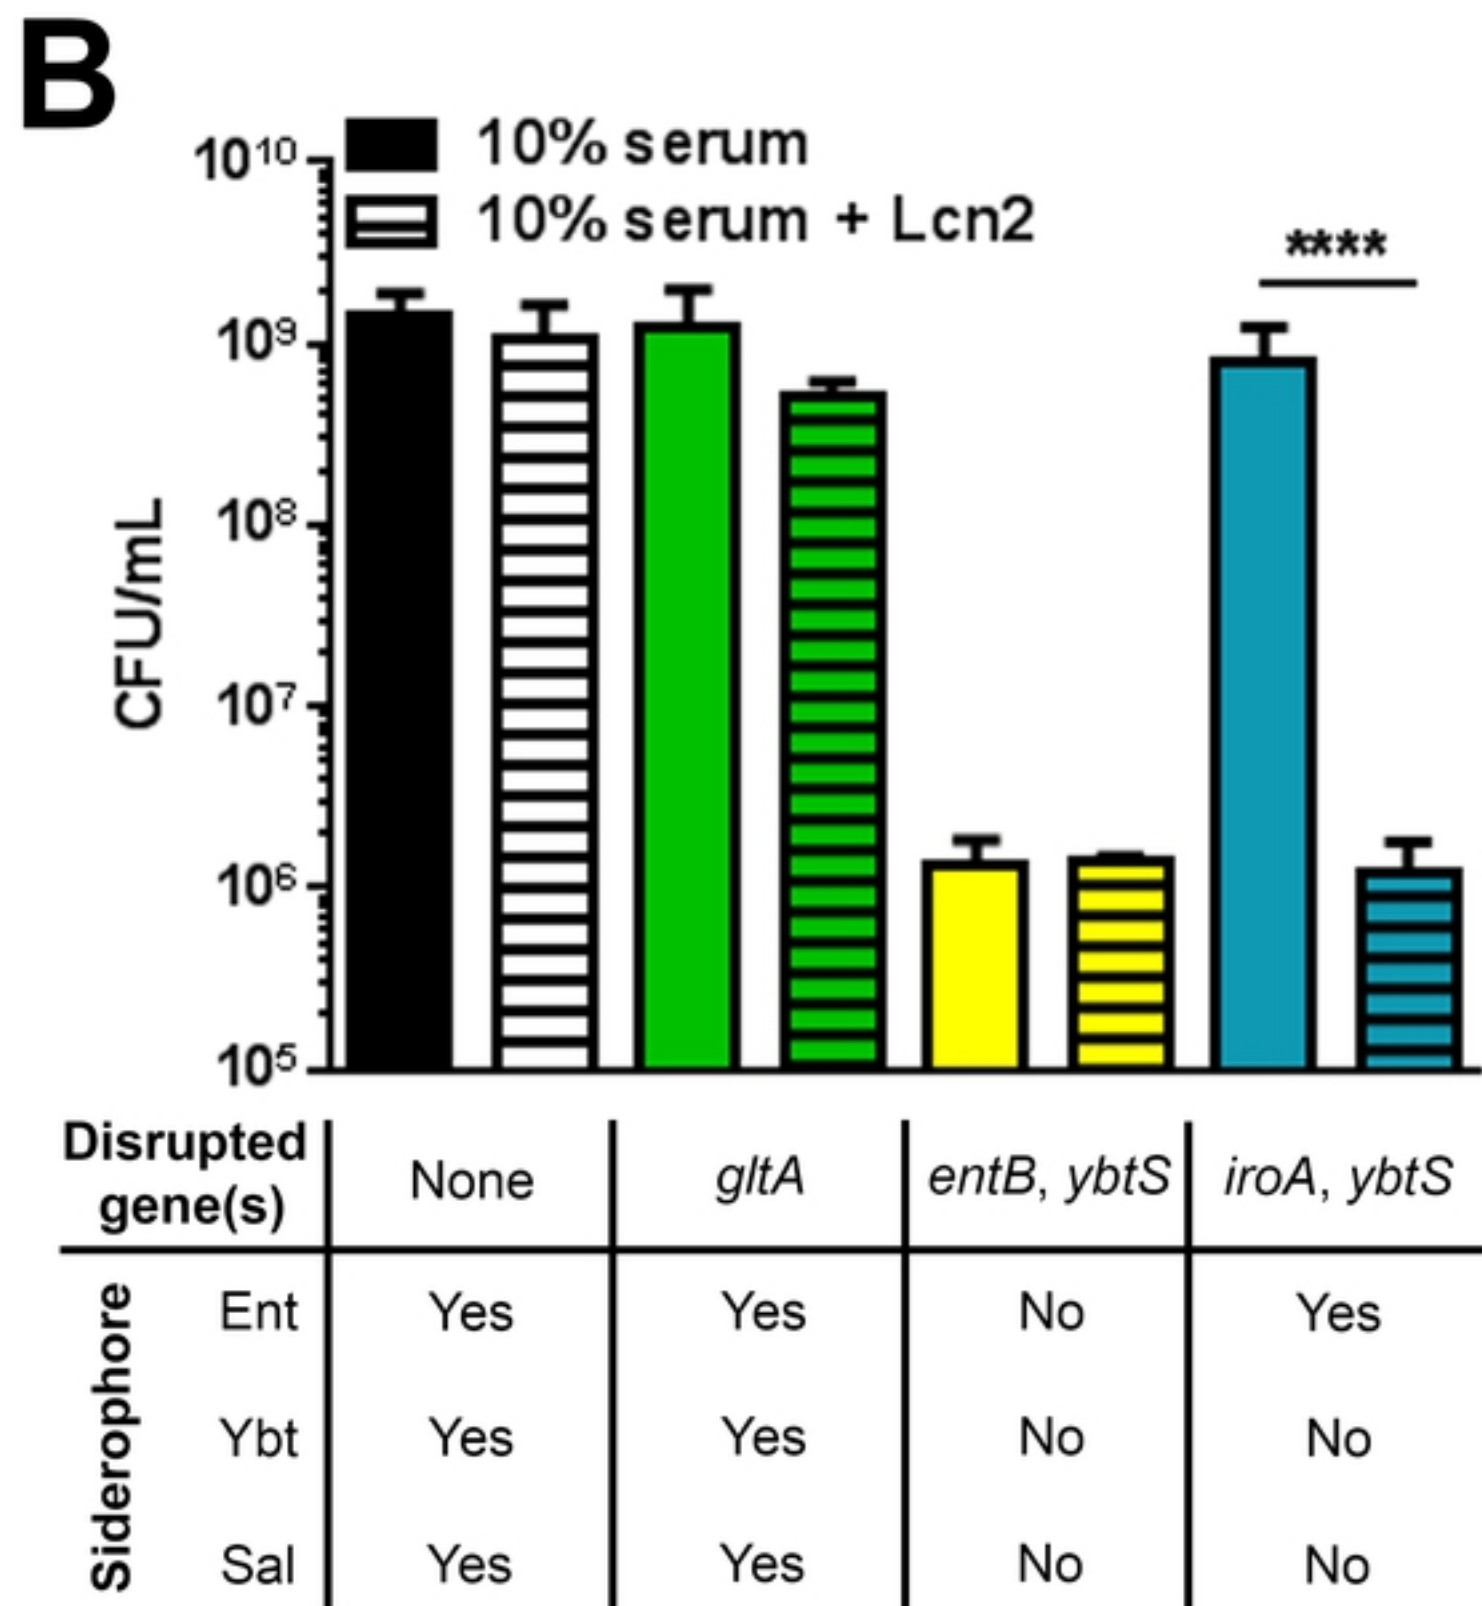

Fig 1

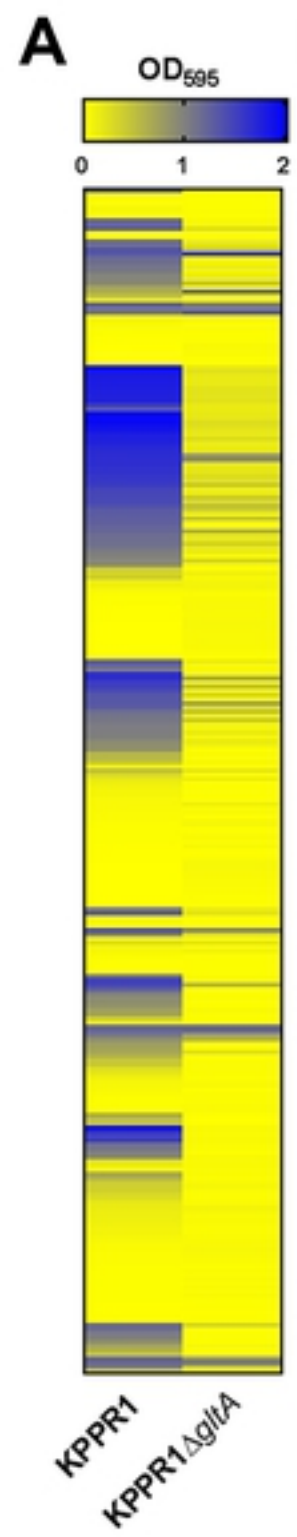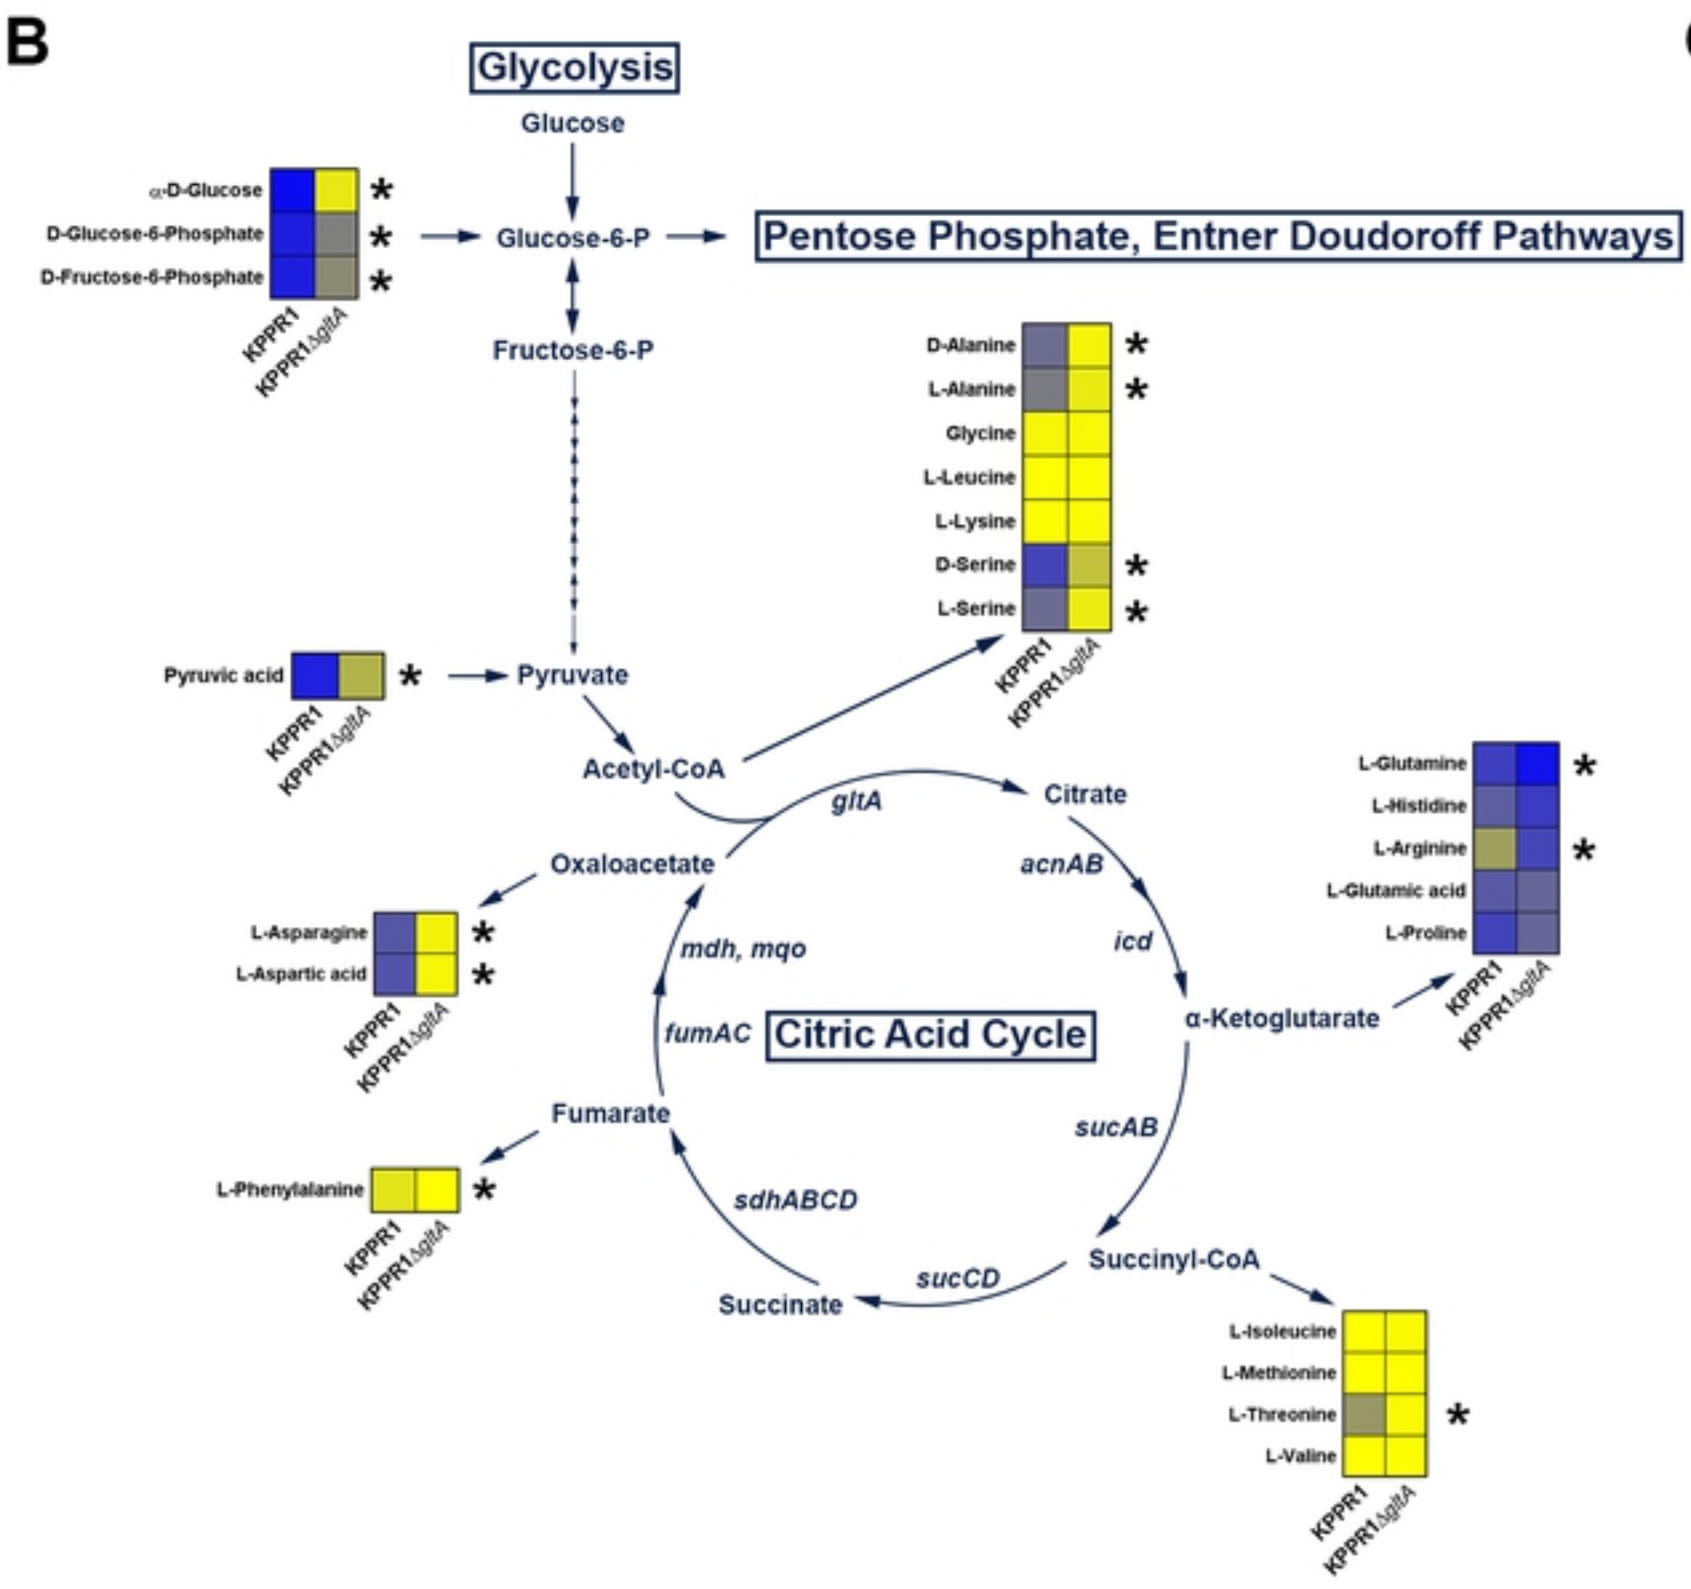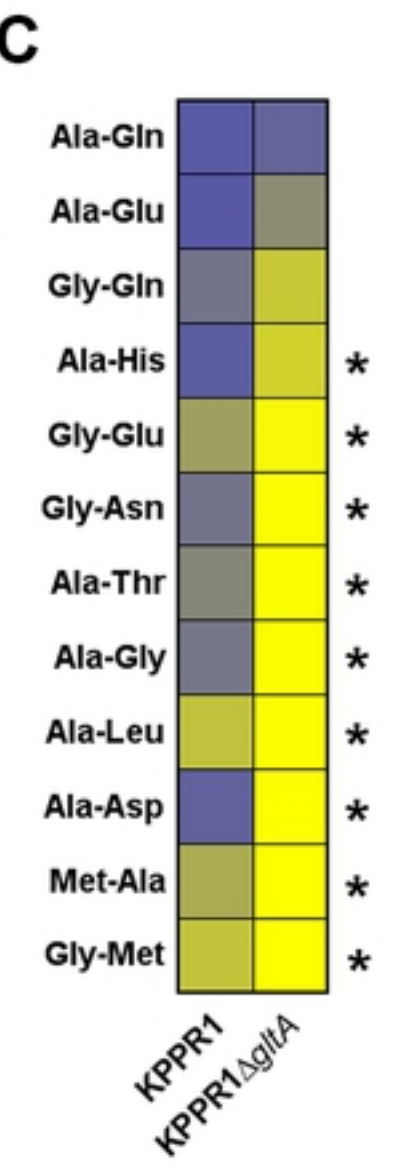

Fig 2

**A**

Glutamate-10mM

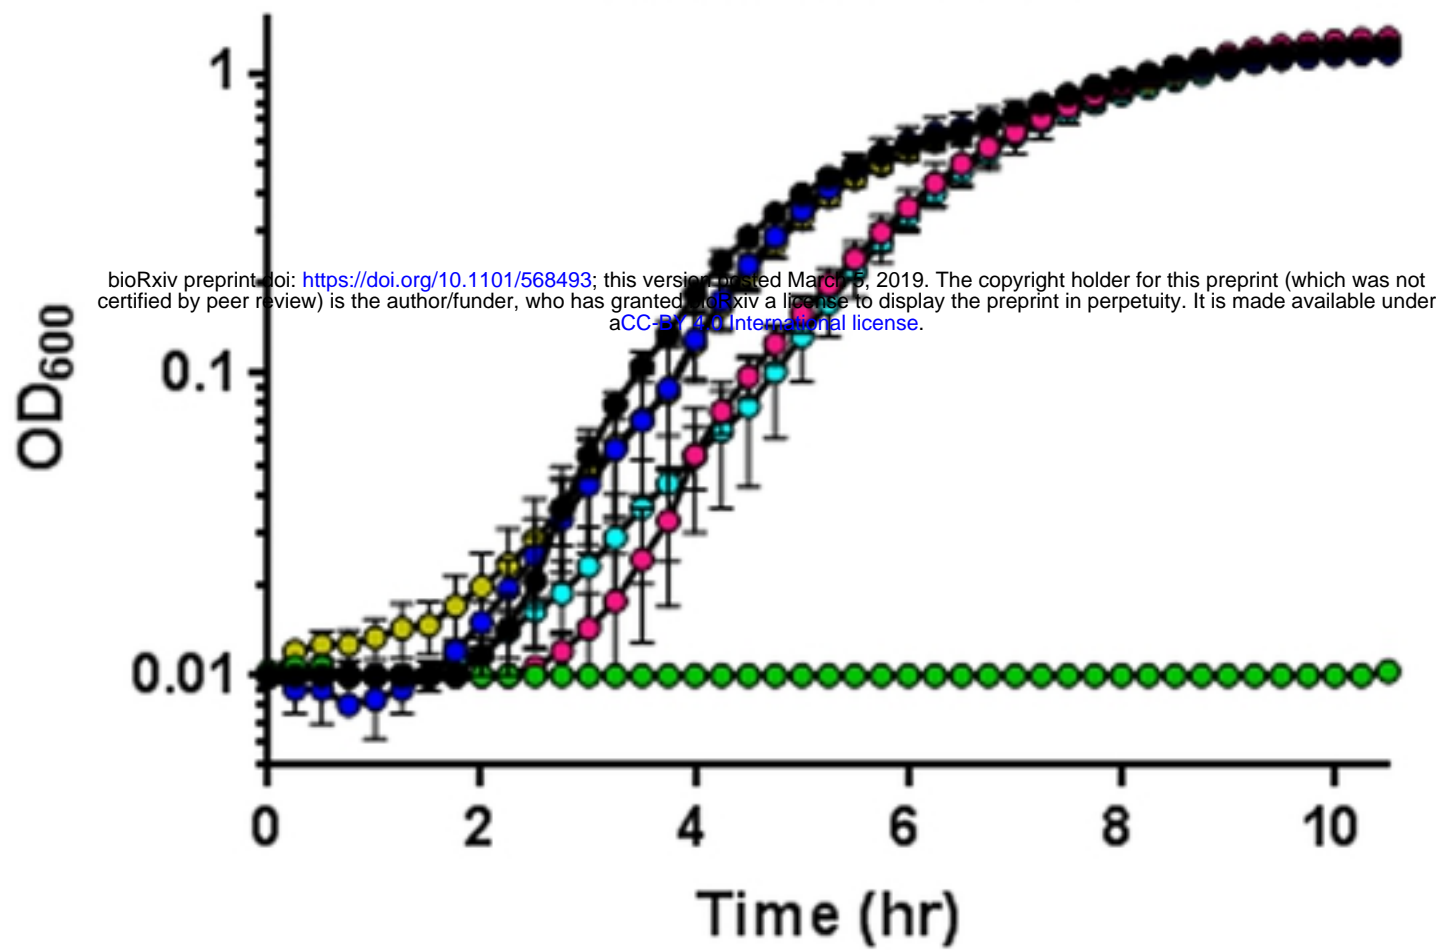In M9-glucose

- KPPR1
- KPPR1  $\Delta$ *gltA*
- KPPR1  $\Delta$ *gltA* pGltA
- KPPR1 +AA
- KPPR1  $\Delta$ *gltA* +AA
- KPPR1  $\Delta$ *gltA* pGltA +AA

**B**

Glutamate

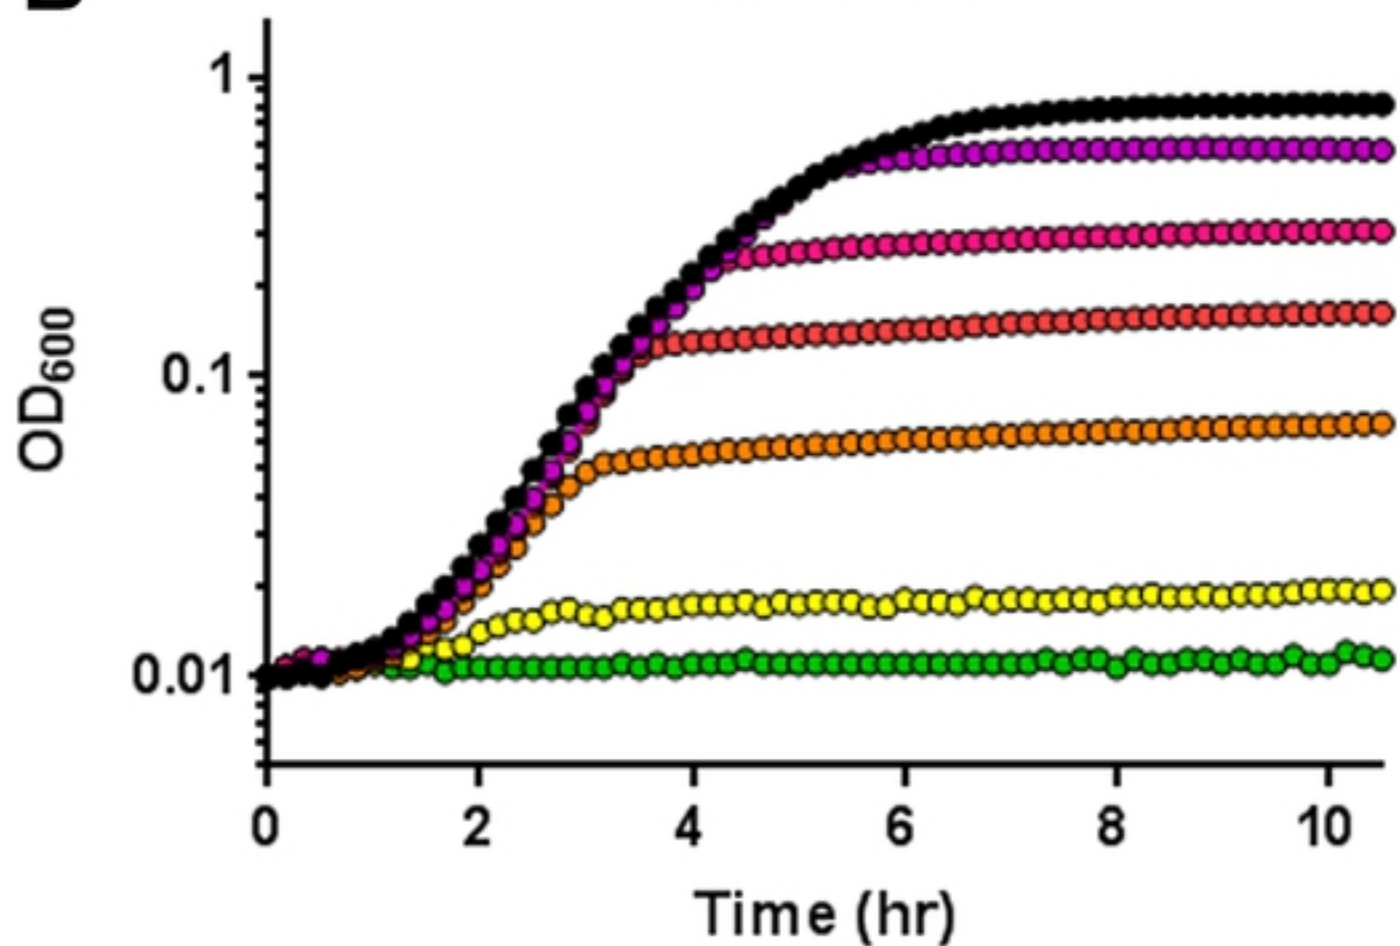In M9-glucose

- KPPR1-0 $\mu$ M
- KPPR1  $\Delta$ *gltA*-500 $\mu$ M
- KPPR1  $\Delta$ *gltA*-200 $\mu$ M
- KPPR1  $\Delta$ *gltA*-100 $\mu$ M
- KPPR1  $\Delta$ *gltA*-50 $\mu$ M
- KPPR1  $\Delta$ *gltA*-5 $\mu$ M
- KPPR1  $\Delta$ *gltA*-0 $\mu$ M



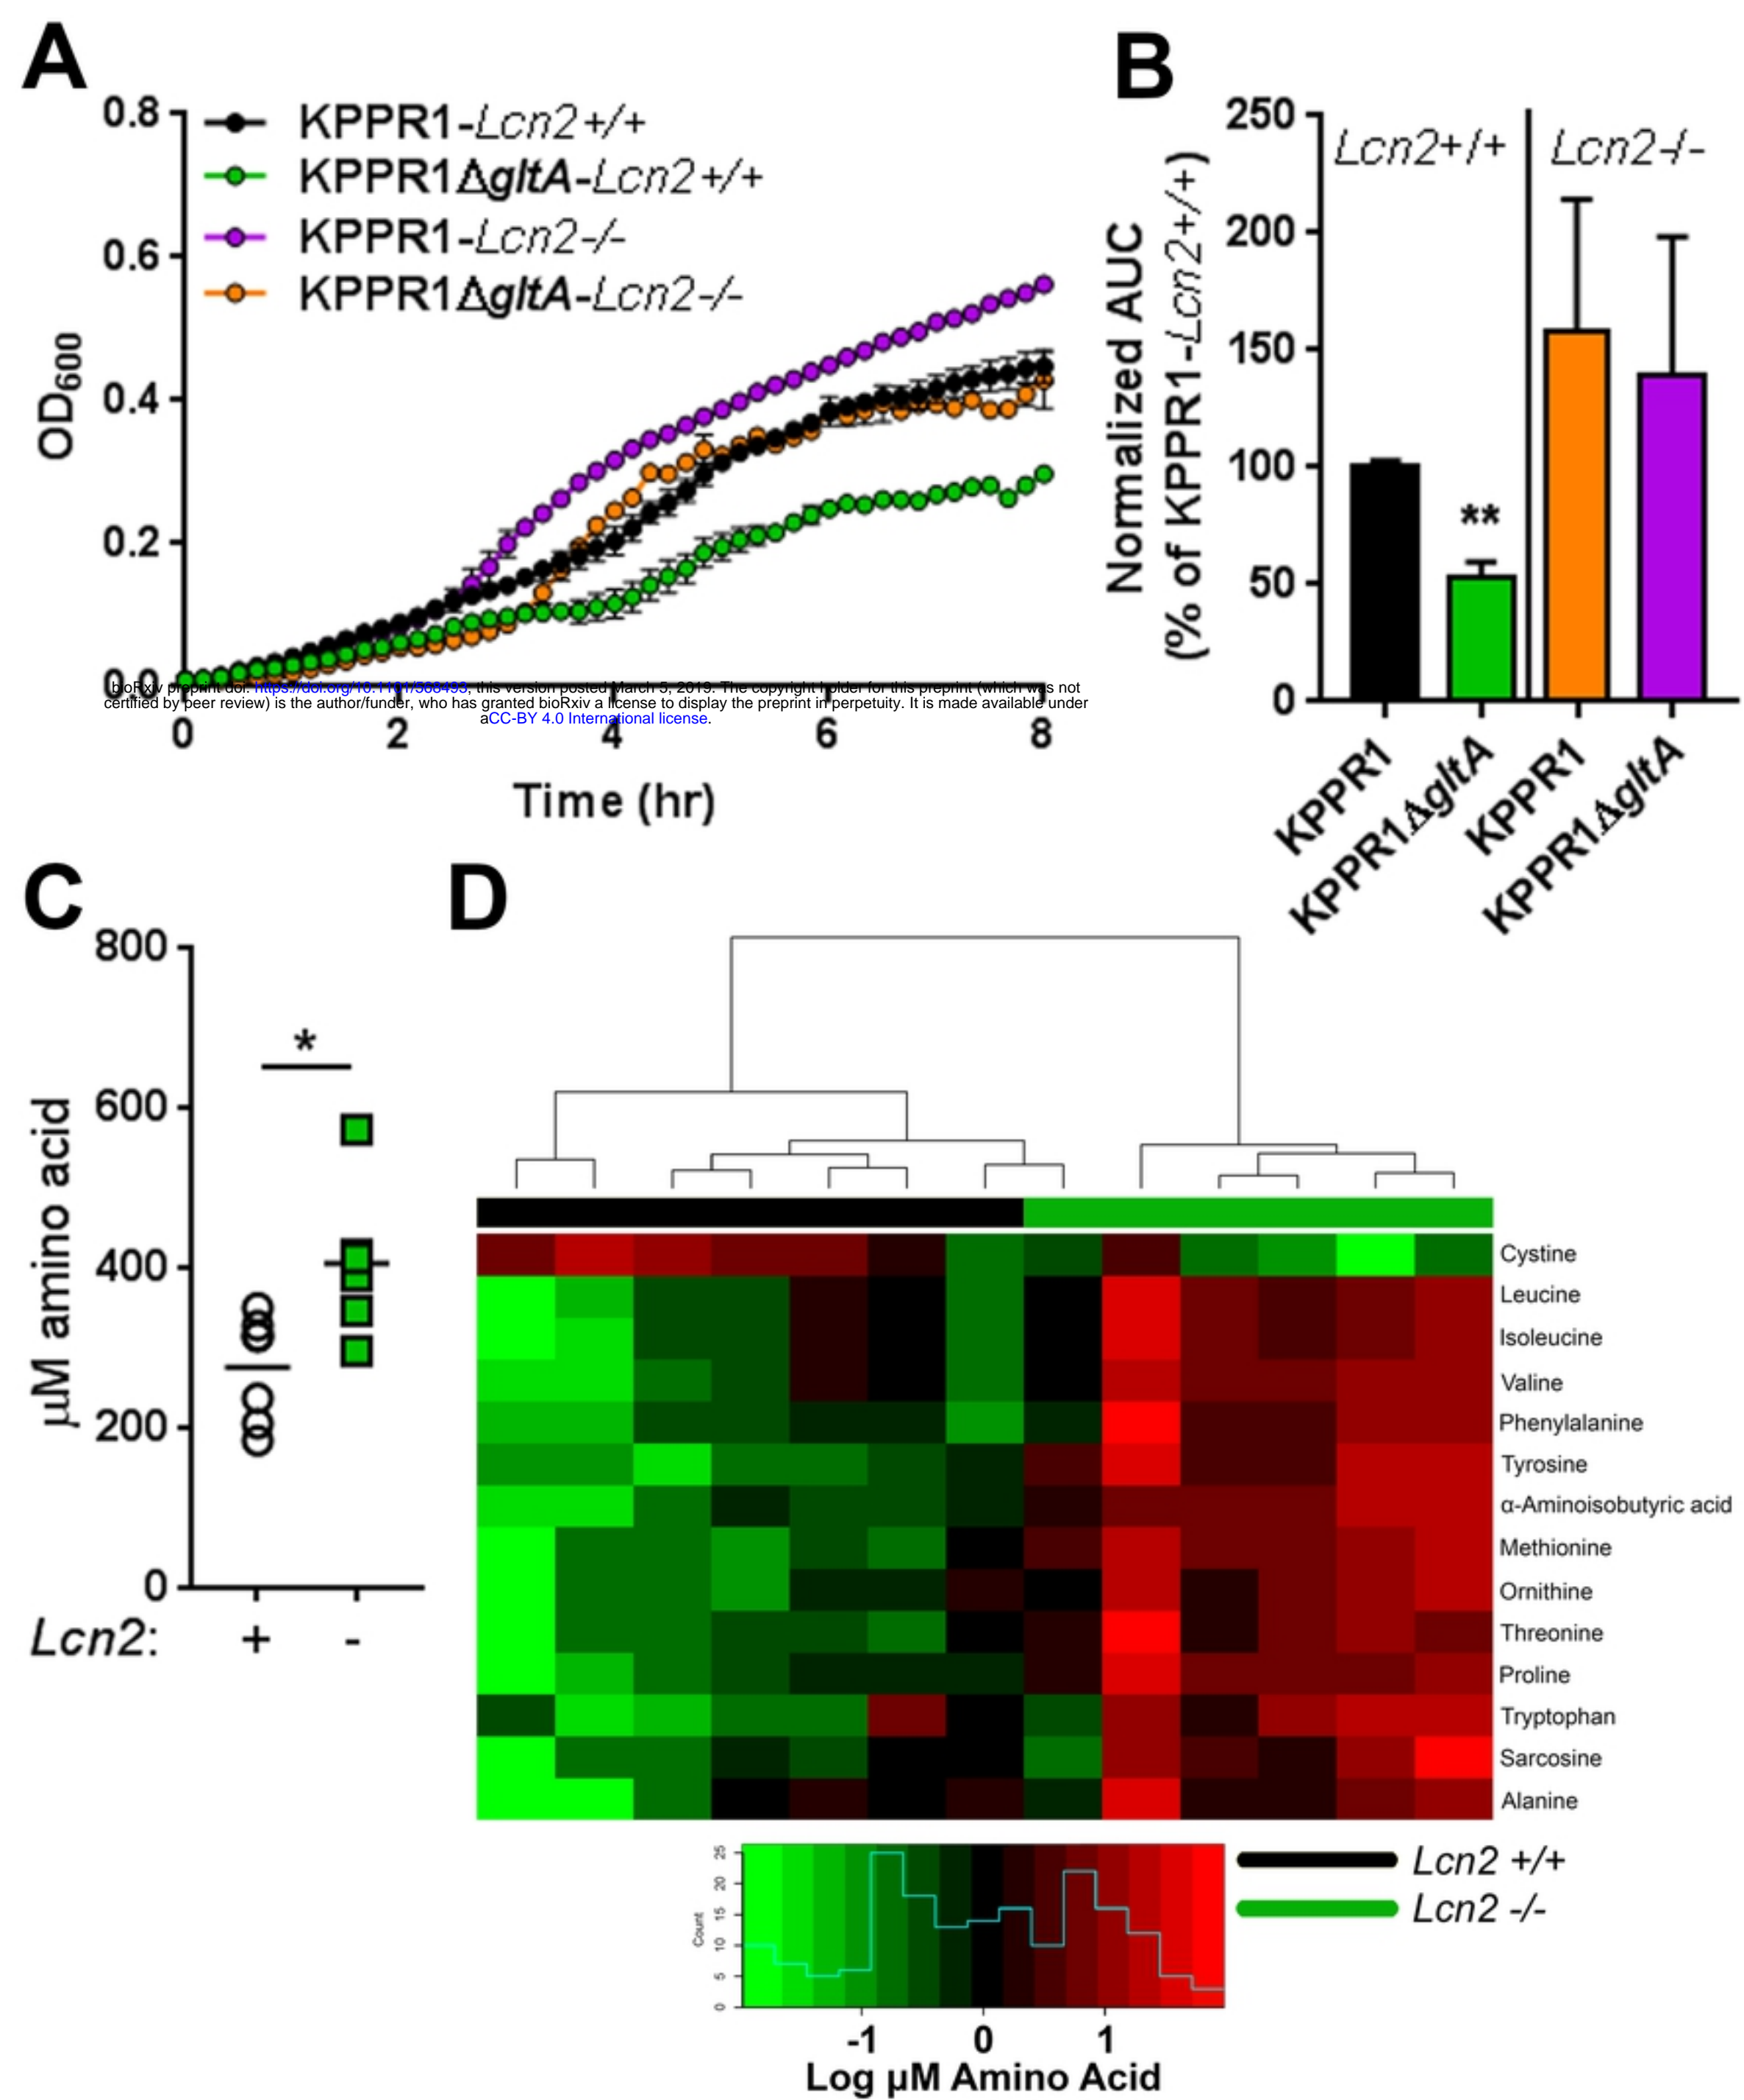

Fig 4

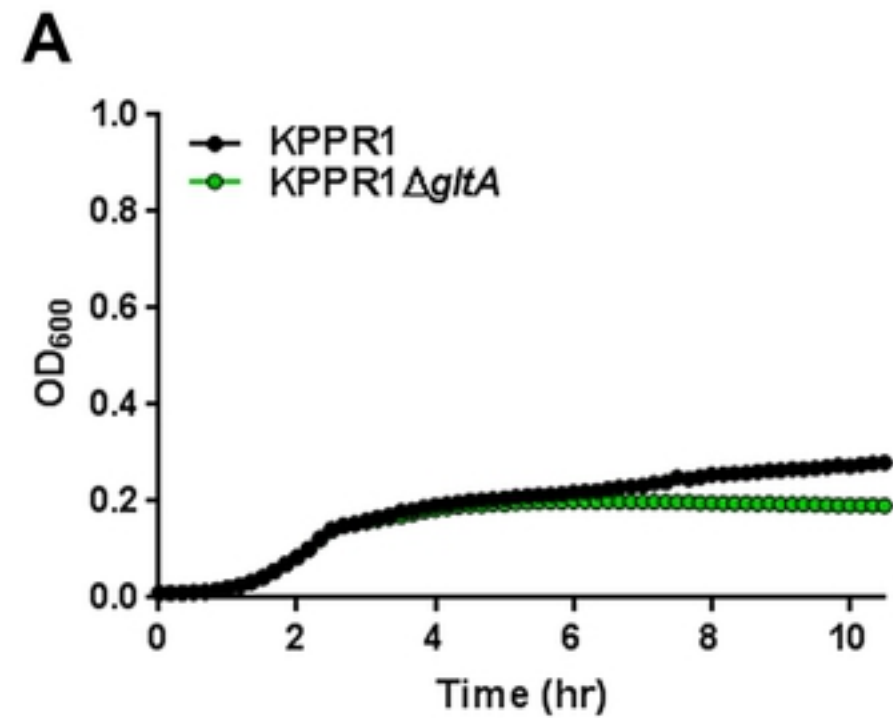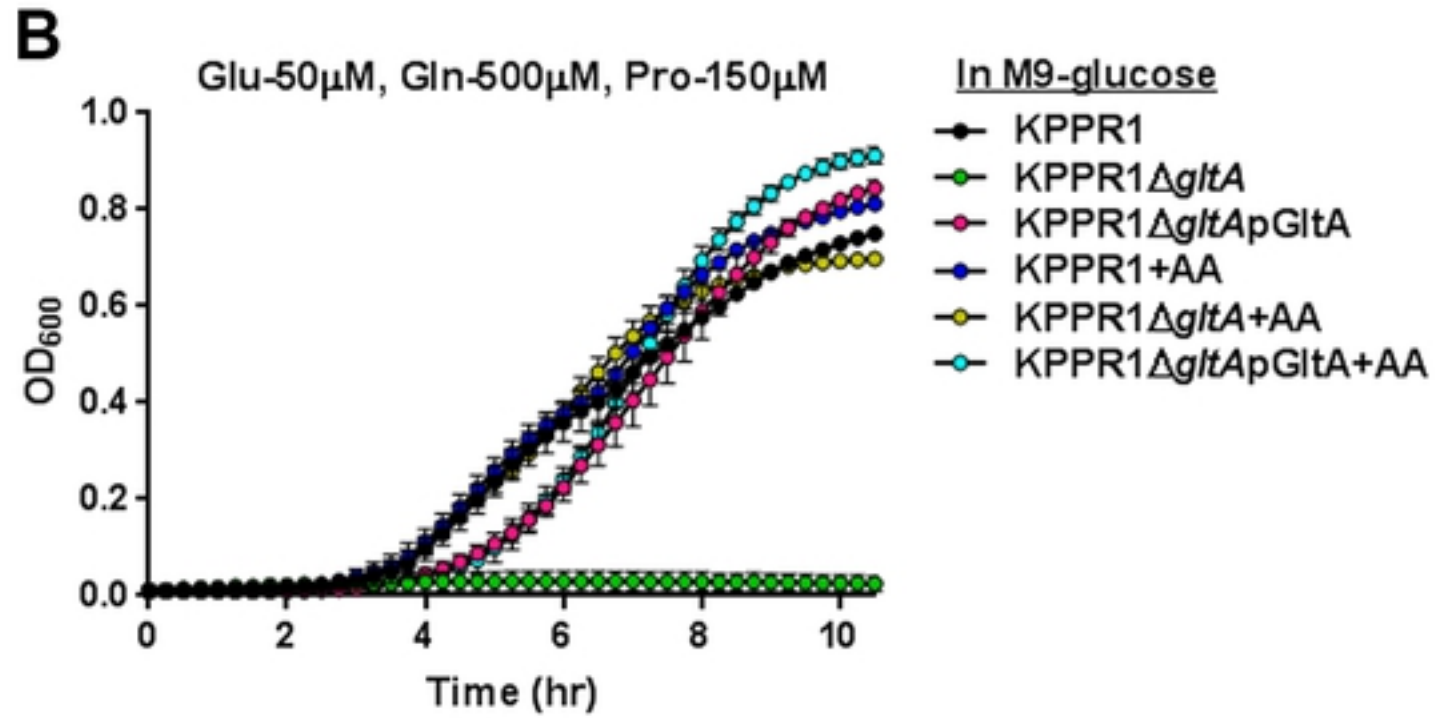

Fig 5

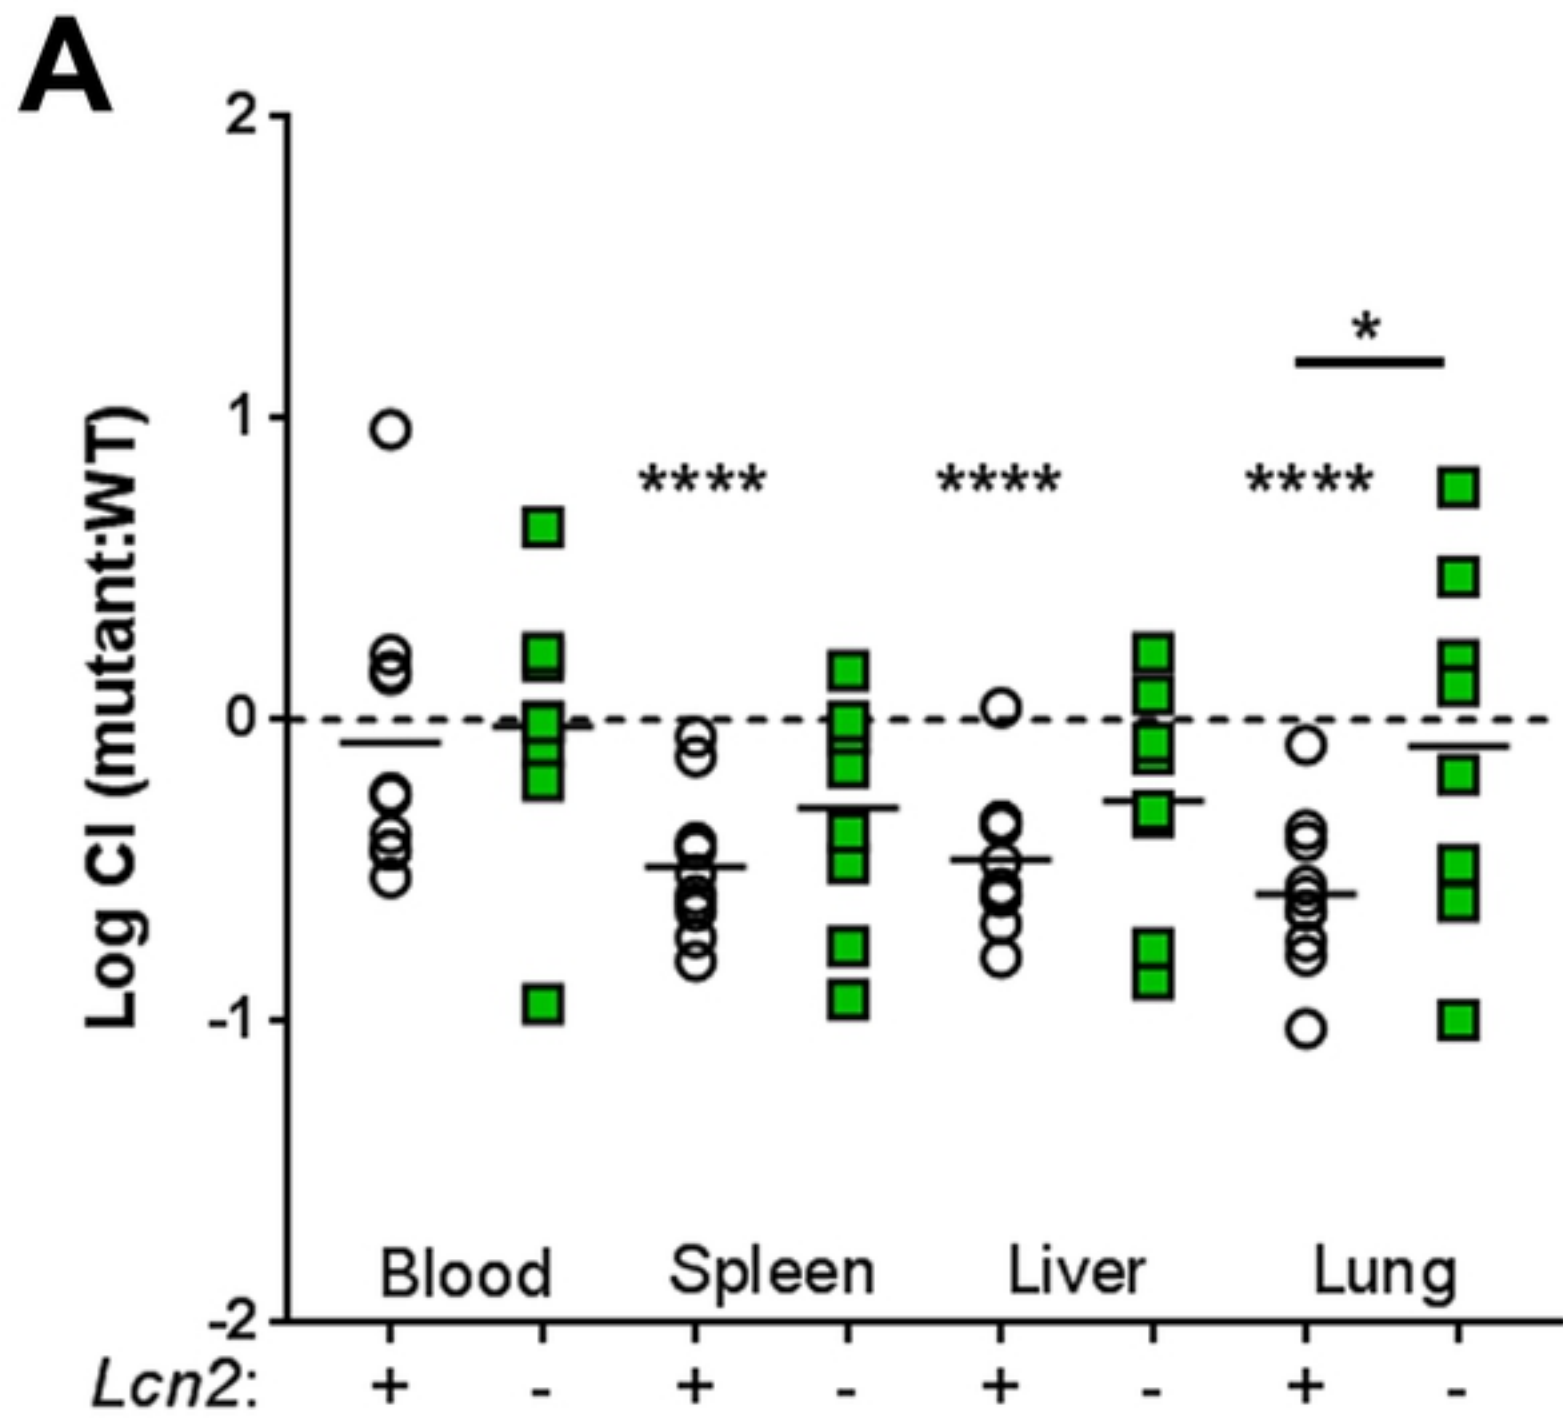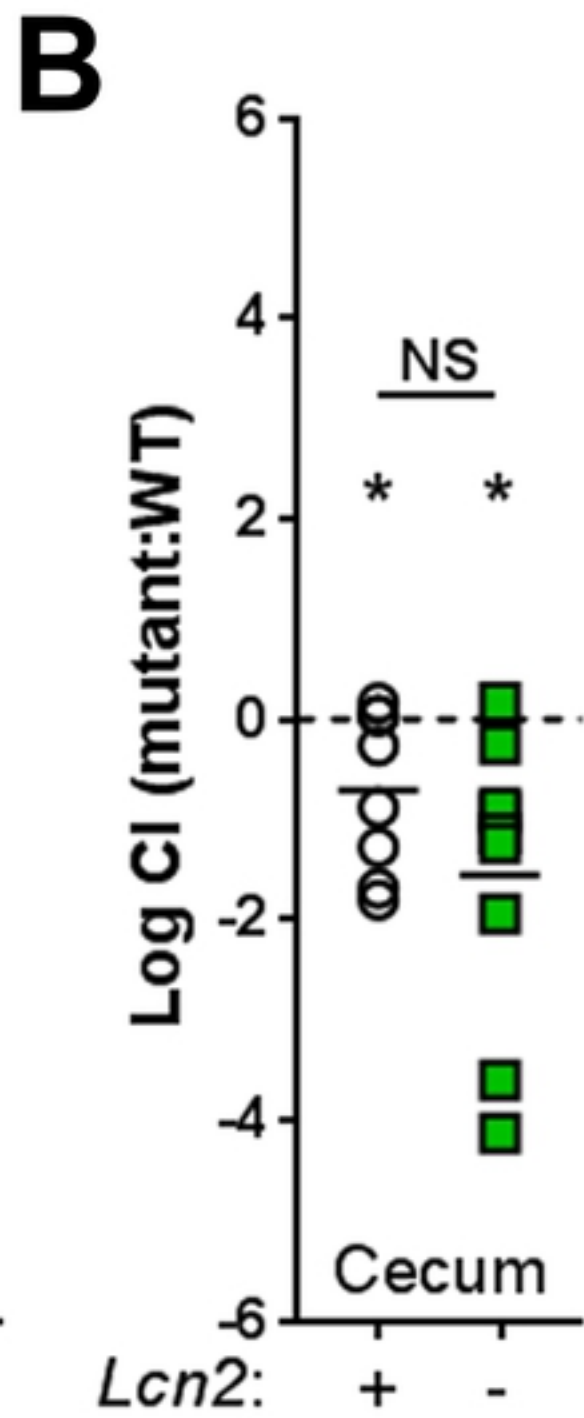

Fig 6
